# Supplementary material for: Predicting Interactions between Virus and Host Proteins Using Repeat Patterns and Composition of Amino Acids
Source: J Healthc Eng. 2018 May 9;2018:1391265. doi: 10.1155/2018/1391265 (PMC5966669; doi:10.1155/2018/1391265)
Supplement: Supplementary Materials — The supporting data and program are available at http://www.bclab.inha.ac.kr/VHPPI. Additional file 1: training and test datasets for examining the applicability of the SVM model to new viruses. Additional file 2: training and test datasets for examining the applicability of the SVM model to new hosts. Additional file 3: training datasets with different ratios of positive to negative instances (1 : 1, 1 : 2, and 1 : 3). Additional file 4: the sequence similarity of each protein pair (x, y) for x in the training dataset and y in the test dataset. Additional file 5: training and test datasets of virus-host PPIs from Barman's study [22]. Additional file 6: training and test datasets of SLiMs from DeNovo [9]. [file 1391265.f1.xlsx]

## Sheet: All new virus training data
human	virus
Q8WWM7	Q6QDQ4
Q9HCE1	Q6QDQ4
Q7L2E3	Q6QDQ4
Q71RC2	Q6QDQ4
Q92900	Q6QDQ4
Q92615	Q6QDQ4
Q92841	Q6QDQ4
Q9H2U1	Q6QDQ4
Q99613	Q6QDQ4
Q92945	Q6QDQ4
Q9NUD5	Q6QDQ4
Q9Y520	Q6QDQ4
Q9Y3F4	Q6QDQ4
Q9NZI8	Q6QDQ4
Q9Y262	Q6QDQ4
Q16629	Q6QDQ4
Q15717	Q6QDQ4
Q15366	Q6QDQ4
P11940	Q6QDQ4
P09651	Q6QDQ4
P07910	Q6QDQ4
O00425	Q6QDQ4
O14979	Q6QDQ4
P06730	Q6QDQ4
O15523	Q6QDQ4
O43432	Q6QDQ4
P55884	Q6QDQ4
P23246	Q6QDQ4
P17844	Q6QDQ4
P22626	Q6QDQ4
P31943	Q6QDQ4
P31942	Q6QDQ4
P26599	Q6QDQ4
Q15233	Q6QDQ4
P42704	Q6QDQ4
P35637	Q6QDQ4
P38159	Q6QDQ4
P52597	Q6QDQ4
P51991	Q6QDQ4
P43243	Q6QDQ4
Q14671	Q6QDQ4
Q06787	Q6QDQ4
P62318	Q6QDQ4
P60842	Q6QDQ4
P61978	Q6QDQ4
P84103	Q6QDQ4
P63244	Q6QDQ4
P67809	Q6QDQ4
Q13310	Q6QDQ4
Q08211	Q6QDQ4
Q07955	Q6QDQ4
Q08170	Q6QDQ4
Q13151	Q6QDQ4
Q12905	Q6QDQ4
Q12906	Q6QDQ4
Q6PKG0	Q6QDQ4
Q9BYF1	Q6Q1S2
Q96WV5	Q91AV1
P53622	Q91AV1
P41811	Q91AV1
O43291	Q03499
O43291	P69616
P02760	P69616
Q92804	Q91NH1
Q96EQ8	Q91NH1
Q9BV36	Q91NH1
Q9H270	Q91NH1
Q68CP9	Q91NH1
O43255	Q91NH1
O75674	Q91NH1
P35579	Q91NH1
P43243	Q91NH1
P50570	Q91NH1
Q06033	Q91NH1
Q9UJY5	Q9E7P0
Q9H6S1	Q9E7P0
Q96GD3	Q9E7P0
Q9BZR8	Q9E7P0
Q96MT8	Q9E7P0
O15169	Q9E7P0
O14744	Q9E7P0
P06733	Q9E7P0
P02545	Q9E7P0
O75569	Q9E7P0
P11940	Q9E7P0
P63267	Q9E7P0
P63261	Q9E7P0
P13797	Q9E7P0
Q7Z6G3	Q9E7P0
Q16206	Q9E7P0
Q6NSJ2	Q9E7P0
Q9BV73	Q9E7P0
Q15025	Q9E7P0
Q13232	Q9E7P0
O14545	Q9E7P0
P60709	Q9E7P0
P62736	Q9E7P0
Q8NB25	Q9E7P0
O94983	Q9E7P0
Q12906	Q9E7P0
Q7Z5R6	Q9E7P0
Q9BUZ4	Q9E7P0
P25963	Q9E7P0
P14618	P14340
P50395	P14340
P60709	P14340
P68104	P14340
P55265	P14340
Q9UHY1	P14340
P06733	P14340
P07437	P14340
P11413	P14340
P08670	P14340
Q96CV9	Q8QXP6
Q96MT8	Q8QXP6
Q7Z5R6	Q8QXP6
Q13554	Q8QXP6
P60866	Q8QXP6
O94983	Q8QXP6
Q9BUZ4	P14335
Q5JU67	P14335
Q5M9Q1	P14335
P25963	P14335
P30622	P14335
P54259	P14335
P63241	P14335
Q03112	P14335
Q12873	P14335
Q13232	P14335
Q5VV67	P14335
Q6NSJ2	P14335
Q6ZTR7	P14335
Q76N89	P14335
Q7Z5R6	P14335
Q8WXU2	P14335
Q96CV9	P14335
Q96MT8	P14335
Q96S94	P14335
Q99848	P14335
Q9BZR8	P14335
Q9H6S1	P14335
Q9NPJ6	P14335
Q9NVW2	P14335
Q9UIK5	P14335
Q9UJY5	P14335
Q9UNM6	P14335
Q9Y3T9	P14335
Q9Y6X2	P14335
O14641	P14335
O94842	P14335
O94983	P14335
P02760	P14335
P06733	P14335
P08238	P14335
P08727	P14335
P11940	P14335
Q9BUZ4	Q5ERI7
Q9H6S1	Q5ERI7
Q9BYC9	Q8JU44
Q13232	Q5ERI7
O15078	Q8JU44
P05106	P06935
Q8IXK0	Q88489
Q8NB25	Q88489
Q92804	Q88489
Q92993	Q88489
Q96EA4	Q88489
Q96EQ8	Q88489
Q96G01	Q88489
Q9BV36	Q88489
Q9H270	Q88489
Q9H814	Q88489
Q9HD26	Q88489
Q9NP64	Q88489
Q9Y6C2	Q88489
Q68CP9	Q88489
O00327	Q88489
O14530	Q88489
O75674	Q88489
P06733	Q88489
P08670	Q88489
P19474	Q88489
P28799	Q88489
P29597	Q88489
P35579	Q88489
P42331	Q88489
P52597	Q88489
P55268	Q88489
P78504	Q88489
Q12824	Q88489
Q13105	Q88489
Q14160	Q88489
Q49A88	Q88489
Q5QJE6	Q88489
Q5VU43	Q88489
Q9BRZ2	Q5U8Y3
A7E2V4	Q5U8Y3
Q15370	Q5U8Y3
P22492	A9YDK9
Q02539	A9YDK9
Q15369	A9YDK9
Q15370	A9YDK9
Q9BRZ2	A9YDK9
A7E2V4	A9YDK9
Q99996	P29991
Q9BWH2	P29991
Q9H074	P29991
Q9NYJ8	P29991
Q9P0K7	P29991
Q9Y6B2	P29991
Q13625	P29991
Q9ULX6	P29991
Q9UKX7	P29991
Q14980	P29991
Q9UJC3	P29991
Q14789	P29991
P63279	P29991
P34931	P29991
P30041	P29991
P51648	P29991
P35222	P29991
P49327	P29991
Q13813	P29991
Q03001	P29991
P68543	P29991
P78344	P29991
Q0VF96	P29991
Q05519	P29991
Q08379	P29991
Q9P219	P29991
Q8WXH0	P29991
Q86SQ7	P29991
Q53SF7	P29991
Q15154	P29991
Q7Z406	P29991
Q5JTC6	P29991
Q6FHW4	P29991
Q8WUM4	P29991
Q8IWT0	P29991
Q86UP2	P29991
Q8IVP5	P29991
Q8NF91	P29991
Q8IX03	P29991
Q8NEF9	P29991
Q96NL6	P29991
Q92667	P29991
Q969X0	P29991
Q99715	P29991
Q99460	P29991
Q99614	P29991
Q9BVG3	P29991
Q9BZF9	P29991
Q9NX95	P29991
Q9H6D7	P29991
Q9Y6C2	P29991
Q14203	P29991
Q14692	P29991
Q13561	P29991
Q13137	P29991
Q14999	P29991
Q15643	P29991
P43243	P29991
P61201	P29991
Q66GS9	P29991
Q8NEZ2	P29991
Q9ULJ7	P29991
Q9UQ90	P29991
Q86VP1	P29991
Q8N302	P29991
P52630	P29991
Q8IUD2	P29991
Q92564	P29991
O00571	P29991
O00505	P29991
A8MPP1	P29991
A6NI86	P29991
A6NCC3	P29991
A2RUB6	P29991
O95613	P29991
O75592	P29991
O15020	P29991
O15117	P29991
O95232	P29991
O75925	P29991
O95154	P29991
P26599	P29991
P04114	P29991
P00558	P29991
P02671	P29991
P17844	P29991
P0C0L4	P29991
P12036	P29991
P0C7X2	P29991
A5YKK6	P29991
O00584	P29991
O14763	P29991
O14972	P29991
P14543	P29991
O60333	P29991
P02647	P29991
P02675	P29991
P02751	P29991
O75521	P29991
P02774	P29991
P04040	P29991
O94979	P29991
P05546	P29991
P05787	P29991
P07942	P29991
P01042	P29991
P27797	P29991
P11142	P29846
O43889	P29846
P0DMV9	P29846
P12036	D2CFJ1
P22492	D2CFJ1
Q02539	D2CFJ1
Q15369	D2CFJ1
Q15370	D2CFJ1
Q9BRZ2	D2CFJ1
A7E2V4	D2CFJ1
Q92804	Q91B85
Q96CN5	Q91B85
Q96EA4	Q91B85
Q99750	Q91B85
Q9BPW8	Q91B85
Q9BV36	Q91B85
Q9BV73	Q91B85
Q9H270	Q91B85
Q9H7J1	Q91B85
Q9H814	Q91B85
Q9NS15	Q91B85
Q9NWQ4	Q91B85
Q9Y6X2	Q91B85
Q68CP9	Q91B85
O00327	Q91B85
O14530	Q91B85
O94983	Q91B85
P06733	Q91B85
P08670	Q91B85
P19474	Q91B85
P28799	Q91B85
P31942	Q91B85
P35579	Q91B85
P52742	Q91B85
P55268	Q91B85
P55287	Q91B85
P78504	Q91B85
Q02833	Q91B85
Q13105	Q91B85
Q14160	Q91B85
Q14192	Q91B85
Q5QJE6	Q91B85
Q5VU43	Q91B85
Q7Z5R6	Q91B85
Q8IVT2	Q91B85
Q8IXK0	Q91B85
Q8N5G2	Q91B85
Q9Y277	Q9WMX2
Q9Y3I0	Q9WMX2
Q9Y5V3	Q9WMX2
Q9Y605	Q9WMX2
Q9GZT9	Q9WMX2
Q14974	Q9WMX2
Q13148	Q9WMX2
Q13451	Q9WMX2
O00571	Q9WMX2
P11586	Q9WMX2
O14980	Q9WMX2
Q9UPT5	Q9WMX2
A8KA83	Q9WMX2
C9JDS9	Q9WMX2
F5GZS6	Q9WMX2
O00264	Q9WMX2
O00499	Q9WMX2
O14598	Q9WMX2
O14681	Q9WMX2
O15173	Q9WMX2
O43175	Q9WMX2
O43852	Q9WMX2
O75127	Q9WMX2
O94966	Q9WMX2
O95153	Q9WMX2
O95292	Q9WMX2
O95373	Q9WMX2
P04908	Q9WMX2
P05023	Q9WMX2
P06241	Q9WMX2
P07437	Q9WMX2
P07900	Q9WMX2
P08238	Q9WMX2
P08574	Q9WMX2
P08631	Q9WMX2
P08754	Q9WMX2
P09651	Q9WMX2
P0C0S8	Q9WMX2
P0DME0	Q9WMX2
P10809	Q9WMX2
P11021	Q9WMX2
P12004	Q9WMX2
P12277	Q9WMX2
P20671	Q9WMX2
P22102	Q9WMX2
P22626	Q9WMX2
P27824	Q9WMX2
P28288	Q9WMX2
P31689	Q9WMX2
P31942	Q9WMX2
P31943	Q9WMX2
P38646	Q9WMX2
P43487	Q9WMX2
P49411	Q9WMX2
P50991	Q9WMX2
P53618	Q9WMX2
P53985	Q9WMX2
P55795	Q9WMX2
P57088	Q9WMX2
P60468	Q9WMX2
P61289	Q9WMX2
P62269	Q9WMX2
P62805	Q9WMX2
P62993	Q9WMX2
P68371	Q9WMX2
P78527	Q9WMX2
Q00610	Q9WMX2
Q03154	Q9WMX2
Q07021	Q9WMX2
Q12905	Q9WMX2
Q13885	Q9WMX2
Q14318	Q9WMX2
Q14739	Q9WMX2
Q15629	Q9WMX2
Q15758	Q9WMX2
Q16637	Q9WMX2
Q16777	Q9WMX2
Q16880	Q9WMX2
Q32P51	Q9WMX2
Q3V6T2	Q9WMX2
Q4VCS5	Q9WMX2
Q6FI13	Q9WMX2
Q6NXR4	Q9WMX2
Q70UQ0	Q9WMX2
Q7L7L0	Q9WMX2
Q7L9L4	Q9WMX2
Q7Z6Z7	Q9WMX2
Q86Y56	Q9WMX2
Q92499	Q9WMX2
Q92973	Q9WMX2
Q93077	Q9WMX2
Q969Z0	Q9WMX2
Q96KK5	Q9WMX2
Q96PU8	Q9WMX2
Q99615	Q9WMX2
Q99878	Q9WMX2
Q9BQG0	Q9WMX2
Q9BTM1	Q9WMX2
Q9BVC6	Q9WMX2
Q9GZU8	Q9WMX2
Q9H4A3	Q9WMX2
Q9H7B4	Q9WMX2
Q9HAV4	Q9WMX2
Q9HB71	Q9WMX2
Q9NVI1	Q9WMX2
Q9NX58	Q9WMX2
Q9P035	Q9WMX2
Q9P219	Q9WMX2
Q9UBB4	Q9WMX2
Q9UGP8	Q9WMX2
Q9UHI6	Q9WMX2
Q9UNF1	Q9WMX2
Q9UNL2	Q9WMX2
P06239	Q9WMX2
P07948	Q9WMX2
P55209	Q9WMX2
P14618	Q9WMX2
O43504	Q9WMX2
Q53GQ0	Q9WMX2
Q99733	Q9WMX2
O15162	Q9WMX2
Q9BVG3	Q99IB8
Q9BXC0	Q99IB8
Q9GZR7	Q99IB8
Q9H074	Q99IB8
Q9NQB0	Q99IB8
Q9NZM3	Q99IB8
Q9P219	Q99IB8
Q9ULJ7	Q99IB8
Q9UNS2	Q99IB8
Q9Y262	Q99IB8
Q9Y2W2	Q99IB8
Q9Y5W7	Q99IB8
Q9UK99	Q99IB8
Q9UNK0	Q99IB8
Q9UQ90	Q99IB8
Q9H8Y8	Q99IB8
Q99816	Q99IB8
O14628	Q99IB8
O14763	Q99IB8
O95613	Q99IB8
P01024	Q99IB8
P02649	Q99IB8
P02675	Q99IB8
P02787	Q99IB8
P04035	Q99IB8
P04114	Q99IB8
P04196	Q99IB8
P06748	Q99IB8
P08603	Q99IB8
P17844	Q99IB8
P35222	Q99IB8
P50440	Q99IB8
P61201	Q99IB8
P80303	Q99IB8
Q08379	Q99IB8
Q13099	Q99IB8
Q13129	Q99IB8
Q13464	Q99IB8
Q13576	Q99IB8
Q13670	Q99IB8
Q14966	Q99IB8
Q14999	Q99IB8
Q14BN4	Q99IB8
Q15084	Q99IB8
Q15717	Q99IB8
Q4ZG55	Q99IB8
Q5JTC6	Q99IB8
Q86UP2	Q99IB8
Q86VW0	Q99IB8
Q8N302	Q99IB8
Q92802	Q99IB8
Q969X0	Q99IB8
Q96CV9	Q99IB8
Q96MT8	Q99IB8
Q96RK0	Q99IB8
Q99550	Q99IB8
P27986	Q99IB8
Q96KQ7	Q99IB8
Q13813	Q99IB8
P0C0L4	Q99IB8
P46939	Q99IB8
P78344	Q99IB8
Q13137	Q99IB8
P45973	Q99IB8
Q15154	Q99IB8
P98175	Q99IB8
Q15643	Q99IB8
O00584	Q99IB8
Q02818	Q99IB8
Q03001	Q99IB8
P11142	Q99IB8
P55265	Q99IB8
A2RUB6	Q99IB8
P22307	Q99IB8
O43716	Q99IB8
P14543	Q99IB8
Q8WWM7	Q99IB8
Q8NEF9	Q99IB8
P02647	Q99IB8
P02749	Q99IB8
O94880	Q99IB8
P05546	Q99IB8
Q6Q788	Q99IB8
Q7Z406	Q99IB8
Q86SQ7	Q99IB8
Q86SX6	Q99IB8
Q86YP4	Q99IB8
O00571	Q99IB8
O75592	Q99IB8
P67936	Q99IB8
P26927	Q99IB8
Q14683	Q99IB8
P02751	Q99IB8
P06241	O92972
P07948	O92972
P08631	O92972
P62993	O92972
Q96SI9	Q03463
Q9H2W1	Q03463
Q6UXK2	Q03463
P51571	Q03463
O95466	Q03463
P07948	Q913V3
Q96T23	P08563
Q96SF2	P08563
Q9BUG6	P08563
Q96KN4	P08563
Q96L50	Q86500
Q9BZE9	P08563
Q9BZJ7	P08563
Q9H4A4	P08563
Q9H4E5	P08563
P36894	P08563
Q9NV12	Q86500
Q9Y6H1	P08563
Q14241	P08563
P46091	P08563
Q14738	P08563
Q15758	P08563
P50995	P08563
P19838	P08563
P20671	P08563
Q5T7P8	P08563
P57735	P08563
P26572	P08563
Q8N755	P08563
P19086	P08563
Q8NDB2	P08563
Q92922	P08563
Q96CX6	P08563
Q96D21	Q86500
Q07021	P08563
Q8IWU4	P08563
P08567	P08563
Q8IWU5	Q86500
Q8TAD8	Q86500
Q96C92	Q86500
Q9NS67	Q86500
Q9NUM4	Q86500
Q9P2N6	Q86500
Q96BM9	Q86500
Q9BV47	P08563
O14770	P08563
O15155	P08563
O43505	Q86500
Q6P161	Q86500
O60486	P08563
O60669	P08563
P18847	Q86500
P02647	Q86500
O75886	P08563
O95476	P08563
O95707	Q86500
P06732	Q86500
O14633	Q86500
O60224	Q86500
P01562	Q86500
P08218	Q86500
P60842	Q86500

## Sheet: HCV
human	virus
P36941	CORE
P02652	CORE
P04637	CORE
P36941	CORE
P61978	CORE
O00571	CORE
O00571	CORE
O00571	CORE
P02652	CORE
P04637	CORE
P31946	CORE
P63104	CORE
O43889	CORE
P38936	CORE
Q15544	CORE
P04637	CORE
Q07021	CORE
P19438	CORE
Q13158	CORE
P01375	CORE
Q15628	CORE
Q12933	CORE
P19793	CORE
P40763	CORE
Q15631	CORE
Q9BWH2	CORE
O15350	CORE
P04637	CORE
P23458	CORE
O60674	CORE
P25445	CORE
P51946	CORE
P20226	CORE
Q13625	CORE
P84022	CORE
Q09472	CORE
Q92793	CORE
O60603	CORE
Q09160	CORE
P13747	CORE
P42224	CORE
P24666	CORE
P23528	CORE
Q9Y680	CORE
P10809	CORE
P05783	CORE
P08727	CORE
P05787	CORE
Q9Y694	CORE
Q6P1N9	CORE
O76003	CORE
P08670	CORE
P06748	CORE
P25490	CORE
P29590	CORE
Q9UPY3	CORE
P61289	CORE
Q9UPY3	CORE
O00468	CORE
P56945	CORE
P34810	CORE
P08572	CORE
O15523	CORE
Q9UHF1	CORE
P98095	CORE
Q9UBX5	CORE
P04406	CORE
P28799	CORE
P31629	CORE
P13378	CORE
O60711	CORE
Q86UE6	CORE
Q8N2S1	CORE
Q9Y5V3	CORE
O75095	CORE
Q9H8L6	CORE
P22736	CORE
Q86U42	CORE
O96013	CORE
O15162	CORE
Q96EP0	CORE
Q9BYW2	CORE
O15432	CORE
P04275	CORE
P62258	CORE
Q96T23	CORE
Q9HB58	CORE
P52294	CORE
P17844	CORE
P19525	CORE
Q07869	CORE
Q96HD9	CORE
Q07820	CORE
P02788	E1
P27797	E1
P27824	E1
P11021	E1
Q9NNX6	E1
Q9H2X3	E1
Q9NNX6	E1
P05412	E1
P22736	E1
P07737	E1
Q9BYW2	E1
P62328	E1
P02788	E2
P27797	E2
P27824	E2
P11021	E2
P19525	E2
P60033	E2
P60033	E2
Q8WTV0	E2
P60033	E2
P02788	E2
P02787	E2
P60033	E2
Q9NZJ5	E2
Q9NNX6	E2
Q9H2X3	E2
P34741	E2
Q9NNX6	E2
P13378	E2
P05556	E2
Q9P2D6	E2
P22736	E2
P60900	E2
Q9BYW2	E2
P51522	F
Q9UHV9	F
Q99471	F
P01019	F
P25311	F
P07858	F
O75352	F
P61106	F
P01008	F
Q11201	F
O60844	F
Q9UHD4	NS2
P10643	NS2
Q9UBX5	NS2
P13378	NS2
P22736	NS2
P20265	NS2
Q9BYW2	NS2
P14373	NS2
P02686	NS3
P04553	NS3
Q8N257	NS3
P17612	NS3
P17612	NS3
P04637	NS3
Q8N257	NS3
P08697	NS3
P05155	NS3
O14744	NS3
Q99873	NS3
Q14653	NS3
P62314	NS3
P28062	NS3
P84022	NS3
O60603	NS3
Q8IUC6	NS3
Q9UKA9	NS3
Q14164	NS3
Q9UHD2	NS3
Q8IUD2	NS3
P12814	NS3
P35609	NS3
Q8IUX7	NS3
Q6UB98	NS3
O15084	NS3
P53365	NS3
Q15052	NS3
P27540	NS3
Q8IXJ9	NS3
P61769	NS3
Q96GW7	NS3
O14874	NS3
Q16548	NS3
P41182	NS3
Q27J81	NS3
Q7L4P6	NS3
Q6P1W5	NS3
Q13137	NS3
Q9Y3M2	NS3
A2RUB6	NS3
Q8NBZ0	NS3
Q8TD31	NS3
O43866	NS3
Q9UJX2	NS3
Q9HCU4	NS3
O94986	NS3
Q8TEP8	NS3
P27918	NS3
Q8IZ52	NS3
Q9BR76	NS3
P67870	NS3
P29279	NS3
Q9NP73	NS3
O75398	NS3
P17661	NS3
P10515	NS3
Q96N67	NS3
Q92782	NS3
Q9UHL4	NS3
P68104	NS3
Q12805	NS3
O95967	NS3
P41567	NS3
Q9NRA8	NS3
Q96EK7	NS3
Q6ZS17	NS3
Q8TES7	NS3
P23142	NS3
P98095	NS3
Q9UBX5	NS3
P35555	NS3
Q75N90	NS3
P07332	NS3
Q6PIW4	NS3
Q8NFF5	NS3
P02751	NS3
Q14CM0	NS3
O43559	NS3
P02794	NS3
Q9BTY2	NS3
P10253	NS3
P32456	NS3
P14136	NS3
P62879	NS3
Q3T8J9	NS3
P31629	NS3
P61978	NS3
Q9NSC5	NS3
P16144	NS3
Q9Y219	NS3
P05412	NS3
Q07666	NS3
Q9HCM3	NS3
Q9P2E2	NS3
Q2M1P5	NS3
P52294	NS3
Q96JM7	NS3
O15230	NS3
P55268	NS3
Q9Y6N6	NS3
Q86U70	NS3
Q96NW7	NS3
Q9C099	NS3
Q8N2S1	NS3
Q9BRK4	NS3
Q9Y5V3	NS3
Q13164	NS3
Q7Z7M0	NS3
Q9HAP2	NS3
Q8TE76	NS3
Q9UBU8	NS3
Q14764	NS3
P55209	NS3
Q9ULW6	NS3
O14594	NS3
O14777	NS3
P07196	NS3
P07197	NS3
Q92832	NS3
Q99435	NS3
P14543	NS3
Q14112	NS3
P46531	NS3
P37198	NS3
Q5VST9	NS3
Q9UKK3	NS3
Q99447	NS3
Q5VU43	NS3
Q96HC4	NS3
Q9NRD5	NS3
P55347	NS3
Q58EX7	NS3
Q9NP80	NS3
Q96M27	NS3
P28065	NS3
P61289	NS3
Q92932	NS3
Q15276	NS3
Q9P0K7	NS3
Q9UJF2	NS3
Q9BWF3	NS3
Q96D15	NS3
Q6NUQ1	NS3
Q96EP0	NS3
Q9GZN7	NS3
Q5QGS0	NS3
Q8N2Y8	NS3
O95248	NS3
Q86SQ7	NS3
Q96T21	NS3
Q9P0V9	NS3
Q9UHV2	NS3
Q86VW0	NS3
Q13435	NS3
Q8IUQ4	NS3
O75093	NS3
O94813	NS3
O75094	NS3
Q9HAU4	NS3
O95219	NS3
Q9BQ16	NS3
Q9HCB6	NS3
O60687	NS3
Q9Y2D8	NS3
Q9NY15	NS3
P40763	NS3
Q4LDE5	NS3
Q8NF91	NS3
Q9UMS6	NS3
P21675	NS3
Q9UPU7	NS3
P24557	NS3
O43294	NS3
Q9NVV9	NS3
Q5T3F8	NS3
P36406	NS3
P14373	NS3
O75962	NS3
Q15643	NS3
Q6PKC3	NS3
Q8TBC4	NS3
Q8N6Y0	NS3
Q9UBK9	NS3
P13611	NS3
P08670	NS3
P04275	NS3
Q9HCS7	NS3
Q9H0D6	NS3
Q9H869	NS3
Q9Y2K1	NS3
Q8N3Z6	NS3
Q9H4I2	NS3
Q9UBW7	NS3
Q9Y2X9	NS3
Q86VK4	NS3
Q8IYH5	NS3
Q14790	NS3
Q86UC2	NS3
O43889	NS4A
Q9BQ52	NS4A
P13378	NS4A
P22736	NS4A
Q9Y228	NS4A
Q9UMX0	NS4A
P02795	NS4A
Q9H6E5	NS4A
P00403	NS4A
P68104	NS4A
P49069	NS4A
Q99941	NS4B
P22105	NS4B
O95197	NS4B
P02753	NS4B
P56181	NS4B
P02679	NS4B
P00414	NS4B
P20339	NS4B
P19525	NS5A
P68400	NS5A
P62993	NS5A
Q9P0L0	NS5A
Q6ZRS2	NS5A
O00410	NS5A
P04637	NS5A
P24941	NS5A
P02647	NS5A
P04637	NS5A
Q16594	NS5A
P27986	NS5A
P04637	NS5A
P20226	NS5A
O00499	NS5A
P78337	NS5A
Q07812	NS5A
P05455	NS5A
P08631	NS5A
P06239	NS5A
P07948	NS5A
P06241	NS5A
Q9P0L0	NS5A
P00973	NS5A
P23458	NS5A
P02649	NS5A
Q9P0L0	NS5A
Q09666	NS5A
Q6FHJ7	NS5A
P29762	NS5A
P02794	NS5A
Q9H6F5	NS5A
P09758	NS5A
P42356	NS5A
P06454	NS5A
Q96P48	NS5A
Q92597	NS5A
P08493	NS5A
Q86XR8	NS5A
Q9UKC9	NS5A
P41240	NS5A
P12931	NS5A
P04114	NS5A
O95292	NS5A
P04049	NS5A
P36897	NS5A
Q15257	NS5A
O00499	NS5A
Q12933	NS5A
Q14318	NS5A
Q14318	NS5A
P07900	NS5A
P53396	NS5A
P53367	NS5A
O15169	NS5A
Q8N7W2	NS5A
Q9ULU8	NS5A
Q86UW7	NS5A
Q8N960	NS5A
Q9BV73	NS5A
Q96MT8	NS5A
Q96EY1	NS5A
Q12805	NS5A
Q14192	NS5A
Q08379	NS5A
Q13227	NS5A
P15814	NS5A
P20701	NS5A
Q7Z4I7	NS5A
P55209	NS5A
Q9ULW6	NS5A
Q16621	NS5A
Q02818	NS5A
Q9HBI0	NS5A
Q15126	NS5A
Q8WUF5	NS5A
P28065	NS5A
Q02543	NS5A
Q9P2E9	NS5A
Q9H0F6	NS5A
Q9H7B4	NS5A
O94875	NS5A
O60504	NS5A
P07996	NS5A
P82094	NS5A
Q13625	NS5A
Q9H2D6	NS5A
Q6PKC3	NS5A
P57075	NS5A
O94966	NS5A
Q8N1B4	NS5A
Q9NXP7	NS5A
O15015	NS5A
Q12933	NS5A
Q15628	NS5A
Q13480	NS5A
P42338	NS5A
Q96IG2	NS5A
P42224	NS5A
Q99836	NS5A
O15530	NS5A
P31749	NS5A
Q96QK1	NS5A
P53778	NS5A
Q8TEX9	NS5A
P49841	NS5A
O95433	NS5A
P49840	NS5A
Q00534	NS5A
Q96BZ9	NS5A
Q9P0L0	NS5B
Q14240	NS5B
P19338	NS5B
Q9UJM8	NS5B
O95801	NS5B
P12814	NS5B
Q9P0L0	NS5B
P17844	NS5B
Q16513	NS5B
Q9UKA9	NS5B
Q9UKC9	NS5B
P23284	NS5B
O95292	NS5B
O15111	NS5B
Q9BV73	NS5B
Q76N32	NS5B
P13378	NS5B
P22736	NS5B
Q13438	NS5B
P28065	NS5B
Q9BYW2	NS5B
Q9H0F6	NS5B
Q9UMX0	NS5B
Q9BW66	NS5B
P28070	NS5B
Q14141	NS5B
P09651	NS5B
O95466	p7
O14498	p7
Q9H2W1	p7
P35658	p7
P51571	p7
Q96SI9	p7
O43889	p7
P98095	p7
Q9H0Q3	p7
P20700	p7
O94813	p7
Q9UMX0	p7
Q9NRR5	p7

## Sheet: SARS
human	virus
P62753	P0C6U8
O75348	P0C6X7
Q9BYF1	P59594
P09651	P59595
P62937	P59595
P63165	P59595
P63279	P59595
O14920	P59596
P02768	P59633
P05155	P59633
Q13561	P59633
P52292	P59634
Q13561	P59634
Q92994	P59634
O43765	P59635
P10415	P59635
Q07817	P59635
Q07820	P59635
Q16548	P59635
Q92843	P59635
Q9BQB6	P59635
Q9H4F8	P59635
P0CW22	P59636
P25787	P59636
P27448	P59636
P60866	P59636
Q07817	P59637
P46379	Q7TFA0
P05155	Q7TFA1
P49069	Q7TFA1

## Sheet: H1N1
human	virus
O14503	P03428
O14641	P03428
O43889	P03428
O75410	P03428
P02511	P03428
P0C7W6	P03428
P43360	P03428
P43364	P03428
P45984	P03428
P49736	P03428
P50222	P03428
Q12800	P03428
Q12933	P03428
Q13077	P03428
Q6P1W5	P03428
Q8N448	P03428
Q8N5I3	P03428
Q8N5R6	P03428
Q8N6Y0	P03428
Q8N9N5	P03428
Q8ND90	P03428
Q8NF50	P03428
Q8NHQ1	P03428
Q8TD10	P03428
Q92997	P03428
Q93062	P03428
Q96DZ9	P03428
Q99081	P03428
Q9H2G9	P03428
Q9P1Z2	P03428
Q9UJ41	P03428
Q9UJC3	P03428
O14503	P03431
O14641	P03431
P01871	P03431
P04233	P03431
P24928	P03431
P35637	P03431
P43364	P03431
P50222	P03431
P51116	P03431
P62917	P03431
P63279	P03431
P68104	P03431
Q06547	P03431
Q12800	P03431
Q15654	P03431
Q16656	P03431
Q8IUQ4	P03431
Q8N448	P03431
Q8N6Y0	P03431
Q8N9N5	P03431
Q8NHQ1	P03431
Q92997	P03431
Q93062	P03431
Q99081	P03431
Q9H892	P03431
Q9H898	P03431
Q9NZF1	P03431
Q9UKT9	P03431
Q9UL40	P03431
O00505	P03433
O14639	P03433
O75489	P03433
P06396	P03433
P10643	P03433
P10746	P03433
P24928	P03433
P25205	P03433
P33991	P03433
P33992	P03433
P33993	P03433
P49736	P03433
P50222	P03433
P81877	P03433
Q13315	P03433
Q13362	P03433
Q32MZ4	P03433
Q6IB77	P03433
Q6IBW4	P03433
Q7LBR1	P03433
Q7Z3B4	P03433
Q8N448	P03433
Q8N661	P03433
Q8NBZ7	P03433
Q96D05	P03433
Q96EC8	P03433
Q96FZ7	P03433
Q96T21	P03433
Q99942	P03433
Q9BXR0	P03433
Q9H3Q1	P03433
Q9NTK5	P03433
Q9UHQ4	P03433
Q9Y224	P03433
Q9Y305	P03433
O43889	P03452
Q8N448	P03452
Q9Y5P4	P03452
O00505	P03466
O43707	P03466
O60684	P03466
P24928	P03466
P43360	P03466
P43364	P03466
P49736	P03466
P51116	P03466
Q13077	P03466
Q13126	P03466
Q8NHQ1	P03466
Q8TD10	P03466
Q96IK5	P03466
Q96MC5	P03466
Q9Y5V3	P03466
O43889	P03468
P50222	P03468
NBPF22P	P03485
O14641	P03485
O75569	P03485
O95793	P03485
P11142	P03485
P15311	P03485
P50222	P03485
Q12800	P03485
Q8N448	P03485
Q92997	P03485
Q96B26	P03485
Q9H190	P03485
Q9H898	P03485
O00159	P03496
O00425	P03496
O00459	P03496
O00505	P03496
O14654	P03496
O14907	P03496
O14908	P03496
O14979	P03496
O15226	P03496
O43143	P03496
O43390	P03496
O60506	P03496
O75348	P03496
O75369	P03496
O75525	P03496
O75569	P03496
O75608	P03496
O95639	P03496
O95793	P03496
P00558	P03496
P04075	P03496
P04406	P03496
P05141	P03496
P05386	P03496
P05388	P03496
P06454	P03496
P06576	P03496
P06733	P03496
P06748	P03496
P07195	P03496
P07437	P03496
P07737	P03496
P07900	P03496
P07910	P03496
P08238	P03496
P08865	P03496
P09651	P03496
P10809	P03496
P11940	P03496
P12036	P03496
P12235	P03496
P12236	P03496
P12277	P03496
P13639	P03496
P14174	P03496
P14866	P03496
P15259	P03496
P15822	P03496
P15880	P03496
P16520	P03496
P16989	P03496
P18583	P03496
P18669	P03496
P19429	P03496
P21912	P03496
P22087	P03496
P22234	P03496
P22492	P03496
P22626	P03496
P23396	P03496
P23497	P03496
P23528	P03496
P26599	P03496
P27348	P03496
P27797	P03496
P27986	P03496
P29966	P03496
P30041	P03496
P31942	P03496
P31943	P03496
P31946	P03496
P35579	P03496
P35580	P03496
P35637	P03496
P36873	P03496
P38159	P03496
P40429	P03496
P40926	P03496
P42336	P03496
P42338	P03496
P43243	P03496
P45984	P03496
P46779	P03496
P46782	P03496
P46783	P03496
P48643	P03496
P49589	P03496
P51116	P03496
P51991	P03496
P52597	P03496
P55265	P03496
P55795	P03496
P57721	P03496
P60174	P03496
P60660	P03496
P61978	P03496
P61981	P03496
P62136	P03496
P62140	P03496
P62158	P03496
P62258	P03496
P62269	P03496
P62306	P03496
P62750	P03496
P62805	P03496
P62847	P03496
P62873	P03496
P62879	P03496
P62937	P03496
P63104	P03496
P63241	P03496
P63279	P03496
P67809	P03496
P68104	P03496
P68366	P03496
P68371	P03496
P80723	P03496
P84090	P03496
Q00839	P03496
Q02539	P03496
Q03188	P03496
Q05639	P03496
Q07666	P03496
Q07817	P03496
Q08211	P03496
Q08380	P03496
Q12905	P03496
Q12906	P03496
Q13105	P03496
Q13151	P03496
Q13190	P03496
Q13227	P03496
Q13310	P03496
Q14103	P03496
Q14160	P03496
Q14258	P03496
Q15365	P03496
Q15366	P03496
Q15633	P03496
Q15717	P03496
Q15942	P03496
Q32P51	P03496
Q3BBV2	P03496
Q3ZCQ8	P03496
Q49A26	P03496
Q562R1	P03496
Q5JVF3	P03496
Q5SXM2	P03496
Q5TA45	P03496
Q5VTE0	P03496
Q6IS14	P03496
Q6PI77	P03496
Q71U36	P03496
Q7L2E3	P03496
Q7Z406	P03496
Q86U42	P03496
Q86YZ3	P03496
Q8N0Y7	P03496
Q8N163	P03496
Q8N448	P03496
Q8N9N5	P03496
Q8NC69	P03496
Q8NHW5	P03496
Q8WWM7	P03496
Q8WYJ6	P03496
Q92569	P03496
Q92804	P03496
Q92900	P03496
Q92966	P03496
Q96AT1	P03496
Q96HA1	P03496
Q96RT1	P03496
Q96SI9	P03496
Q99729	P03496
Q9BUJ2	P03496
Q9C099	P03496
Q9GZV4	P03496
Q9H1D9	P03496
Q9H898	P03496
Q9HA38	P03496
Q9HAV0	P03496
Q9HCE1	P03496
Q9NNW5	P03496
Q9NUL3	P03496
Q9NX74	P03496
Q9NY93	P03496
Q9NYF8	P03496
Q9NZI8	P03496
Q9UBW7	P03496
Q9UKM9	P03496
Q9UL40	P03496
Q9Y230	P03496
Q9Y265	P03496
Q9Y2I1	P03496
Q9Y3I0	P03496
Q9Y692	P03496
Q9Y6M1	P03496
Q9Y6X2	P03496
O43303	P03508
O75348	P03508
O95219	P03508
O95229	P03508
P01857	P03508
P06733	P03508
P07942	P03508
P08865	P03508
P15822	P03508
P19429	P03508
P21912	P03508
P27540	P03508
P35658	P03508
P63010	P03508
P63167	P03508
Q08AM6	P03508
Q13105	P03508
Q13155	P03508
Q13227	P03508
Q13561	P03508
Q49A26	P03508
Q4J6C6	P03508
Q5SXM2	P03508
Q6PI77	P03508
Q8N4C6	P03508
Q8TD31	P03508
Q96FJ2	P03508
Q96HA1	P03508
Q96MW5	P03508
Q96RT1	P03508
Q9H1D9	P03508
Q9H257	P03508
Q9H3R5	P03508
Q9NS73	P03508
Q9UBW7	P03508
Q9UIA0	P03508
Q9Y244	P03508
Q9Y2V7	P03508
Q9Y692	P03508
Q9Y6N6	P03508
Q9Y6X2	P03508
O14641	P06821
P24278	P06821
P35520	P06821
P50222	P06821
Q12800	P06821
Q8N448	P06821
Q92997	P06821
Q93062	P06821
Q9Y6X0	P06821

## Sheet: HPV-16
human	virus
P28749	A0MPS7
Q08999	A0MPS7
P06400	A0MPS7
Q96SB4	A7Y3Z3
Q92973	P03101
Q14974	P03101
P52292	P03101
O00410	P03101
Q9GZM7	P03107
Q8TCT4	P03107
Q14974	P03107
Q92973	P03107
Q9HBE1	P03107
Q8TAE8	P03107
P52292	P03107
O00410	P03107
O00754	P03107
P63279	P03114
Q15645	P03114
P31274	P03120
Q9BX70	P03120
Q9Y244	P03120
Q15637	P03120
Q00403	P03120
P21675	P03120
P22736	P03120
Q92831	P03120
Q8TD31	P03120
P20226	P03120
P49715	P03120
P82094	P03120
Q16637	P03120
Q99966	P03120
Q9H0C5	P03120
P17676	P03120
P04637	P03120
Q92547	P03120
O60885	P03120
Q96QZ7	P03126
Q14257	P03126
Q14974	P03126
Q13227	P03126
P52292	P03126
Q9UHV2	P03126
Q92793	P03126
P18887	P03126
P19438	P03126
P49815	P03126
Q09472	P03126
Q12959	P03126
Q14160	P03126
Q14653	P03126
Q16611	P03126
Q92973	P03126
Q9P2F8	P03126
Q13158	P03126
P23142	P03126
Q05086	P03126
P04637	P03126
P38398	P03126
Q9NQC7	P03126
P33993	P03126
O15350	P03126
O43166	P03126
P01106	P03126
O14907	P03126
O14746	P03126
Q96EY1	P03129
P38398	P03129
Q14188	P03129
Q14209	P03129
Q14978	P03129
P20226	P03129
P20248	P03129
Q5JSB6	P03129
P17275	P03129
P17535	P03129
P62191	P03129
P24941	P03129
Q92769	P03129
Q92793	P03129
Q92831	P03129
P06493	P03129
P09132	P03129
P09543	P03129
P10914	P03129
P11802	P03129
P12004	P03129
P23458	P03129
P24278	P03129
P24864	P03129
P25791	P03129
P30153	P03129
P30281	P03129
P32969	P03129
P35998	P03129
P49760	P03129
P51784	P03129
P54646	P03129
P62826	P03129
P62851	P03129
P68400	P03129
Q00535	P03129
Q04864	P03129
Q08117	P03129
Q13573	P03129
Q13895	P03129
Q14186	P03129
Q15329	P03129
Q15369	P03129
Q15370	P03129
Q15561	P03129
Q15678	P03129
Q16825	P03129
Q17RD7	P03129
Q2M2I8	P03129
Q53FD0	P03129
Q7Z7L7	P03129
Q86Y26	P03129
Q86YD7	P03129
Q8N2X6	P03129
Q8N5A5	P03129
Q8N7W2	P03129
Q8NBS9	P03129
Q8TAU3	P03129
Q8TCE9	P03129
Q8WXI9	P03129
Q96CW1	P03129
Q96I24	P03129
Q9BW85	P03129
Q9BWG6	P03129
Q9C086	P03129
Q9H9D4	P03129
Q9NRY4	P03129
Q9NXH8	P03129
Q9P0J7	P03129
Q9P2H0	P03129
Q9UQ35	P03129
Q9Y237	P03129
Q9Y6N5	P03129
Q08050	P03129
Q09472	P03129
Q13547	P03129
Q14839	P03129
P28749	P03129
Q5T4S7	P03129
P05412	P03129
P14618	P03129
Q16254	P03129
Q01860	P03129
P38936	P03129
P67775	P03129
Q08999	P03129
Q01094	P03129
P06400	P03129
O15304	P03129
O00716	P03129
O15160	P03129
O95363	P03129
O95782	P03129
O96020	P03129
P01106	P03129
P01100	P03129
Q53X12	P06927
P07093	P06927
P08172	P06927
P08195	P06927
P11166	P06927
P11717	P06927
P16070	P06927
P16615	P06927
P17302	P06927
P18031	P06927
P18859	P06927
P23634	P06927
P25116	P06927
P27105	P06927
P27824	P06927
P30101	P06927
P30443	P06927
P33527	P06927
P37059	P06927
P39656	P06927
P40429	P06927
P42166	P06927
P46778	P06927
P46977	P06927
P48047	P06927
P50281	P06927
P50402	P06927
P50416	P06927
P51571	P06927
P53621	P06927
P57088	P06927
P60468	P06927
P61803	P06927
P67812	P06927
P98194	P06927
Q00765	P06927
Q01628	P06927
Q01650	P06927
Q03135	P06927
Q03518	P06927
Q06136	P06927
Q13563	P06927
Q14165	P06927
Q14332	P06927
Q15012	P06927
Q15165	P06927
Q15392	P06927
Q15629	P06927
Q15758	P06927
Q15858	P06927
Q4ZIN3	P06927
Q5HYI8	P06927
Q5VV42	P06927
Q6DD88	P06927
Q6NUQ4	P06927
Q6NZI2	P06927
Q6PIU2	P06927
Q6UVK1	P06927
Q70UQ0	P06927
Q7Z434	P06927
Q8IV08	P06927
Q8N2K0	P06927
Q8NBJ9	P06927
Q8NBM4	P06927
Q8NEW0	P06927
Q8TCJ2	P06927
Q8TCT9	P06927
Q92508	P06927
Q92643	P06927
Q969N2	P06927
Q969X5	P06927
Q96AM1	P06927
Q96BY9	P06927
Q96CS3	P06927
Q96DZ1	P06927
Q96FQ6	P06927
Q96JJ7	P06927
Q96K19	P06927
Q96N66	P06927
Q96S52	P06927
Q96S66	P06927
Q99442	P06927
Q99584	P06927
Q99623	P06927
Q9BQB6	P06927
Q9BSA9	P06927
Q9BSR8	P06927
Q9BTV4	P06927
Q9BVC6	P06927
Q9C0E8	P06927
Q9GZM5	P06927
Q9GZP9	P06927
Q9H2V7	P06927
Q9H490	P06927
Q9H7F0	P06927
Q9HBA0	P06927
Q9HC07	P06927
Q9HD20	P06927
Q9HD45	P06927
Q9HDC9	P06927
Q9NP72	P06927
Q9NQC3	P06927
Q9NRP0	P06927
Q9NVA4	P06927
Q9NVI7	P06927
Q9NXH8	P06927
Q9NXS2	P06927
Q9NZ01	P06927
Q9NZJ7	P06927
Q9NZM1	P06927
Q9NZV5	P06927
Q9P035	P06927
Q9UBU6	P06927
Q9UI14	P06927
Q9UJ14	P06927
Q9UKV5	P06927
Q9UNL2	P06927
Q9UP95	P06927
Q9Y2G8	P06927
Q9Y3E0	P06927
Q9Y4P3	P06927
Q9Y5M8	P06927
Q9Y5S1	P06927
Q9Y6C9	P06927
Q9Y6N5	P06927
A0FGR8	P06927
O00483	P06927
O00767	P06927
O15173	P06927
O15258	P06927
O15260	P06927
O15321	P06927
O15427	P06927
O15439	P06927
O15533	P06927
O43292	P06927
O60353	P06927
O60831	P06927
O75477	P06927
O75762	P06927
O94851	P06927
O94905	P06927
O94919	P06927
O95470	P06927
O95674	P06927
O96005	P06927
P00403	P06927
P00846	P06927
P04114	P06927
P04844	P06927
P04920	P06927
P05023	P06927
P05556	P06927
P26045	Q77E16
Q05086	Q77E16
Q12959	Q9WH13

## Sheet: HIV-1
human	virus
P01730	O09528
Q9Y297	O09528
O00165	O12160
Q09472	O12161
Q92831	O12161
O60563	O12161
O15350	O12161
Q8WUM4	P03347
P22830	P03366
P31350	P03366
P32121	P03366
P50213	P03366
P62993	P03366
Q9UJX6	P03366
Q9UMS0	P03366
Q9Y265	P03366
Q08380	P03366
P07858	P03366
P62714	P03366
P33993	P03366
P13667	P03366
P33991	P03366
P60228	P03366
P46063	P03366
P55884	P03366
Q9Y262	P03366
Q5T4S7	P03366
Q14566	P03366
Q13347	P03366
Q14152	P03366
Q2T9J0	P03366
Q15084	P03366
Q15293	P03366
Q9UGP4	P03366
Q9BRX2	P03366
Q8N163	P03366
Q99613	P03366
Q9UBQ5	P03366
Q9H4L5	P03366
Q9P2R7	P03366
Q9Y266	P03366
O75475	P03366
O00303	P03366
O15372	P03366
O15371	P03366
O75821	P03366
P08631	P03406
P07948	P03407
P12931	P03407
P06241	P03407
P08631	P03407
O95477	P03407
Q99683	P04324
Q10567	P04324
P08631	P04324
P0CG48	P04325
P50750	P04326
Q09472	P04326
Q8TAQ2	P04326
Q92922	P04326
Q92993	P04326
Q12824	P04326
P53999	P04326
P51531	P04326
O60563	P04326
P29120	P04578
P29122	P04578
Q13087	P04578
P09958	P04578
P61073	P04578
P13987	P04578
Q92824	P04578
Q95460	P04578
P04843	P04578
P05067	P04578
P05107	P04578
P06239	P04578
P07339	P04578
P07384	P04578
P08134	P04578
P10321	P04578
P10809	P04578
P13073	P04578
P13612	P04578
P14314	P04578
P14625	P04578
P14854	P04578
P16615	P04578
P17066	P04578
P20674	P04578
P20701	P04578
P21796	P04578
P25786	P04578
P26196	P04578
P27797	P04578
P27824	P04578
P28072	P04578
P30101	P04578
P30443	P04578
P35232	P04578
P43629	P04578
P43630	P04578
P45880	P04578
P48426	P04578
P48723	P04578
P49257	P04578
P50454	P04578
P51571	P04578
P51572	P04578
P51665	P04578
P55072	P04578
P61009	P04578
P61619	P04578
P62195	P04578
P68431	P04578
Q07065	P04578
Q12805	P04578
Q12907	P04578
Q13112	P04578
Q13162	P04578
Q13217	P04578
Q13283	P04578
Q13438	P04578
Q13724	P04578
Q14257	P04578
Q14554	P04578
Q14574	P04578
Q14696	P04578
Q14697	P04578
Q15005	P04578
Q15165	P04578
Q15392	P04578
Q15782	P04578
Q3MHD2	P04578
Q5BKY9	P04578
Q6DD88	P04578
Q8IYS2	P04578
Q8N4V1	P04578
Q8N766	P04578
Q8NBJ5	P04578
Q8NBJ7	P04578
Q8NBS9	P04578
Q8NFQ8	P04578
Q8TCT9	P04578
Q92598	P04578
Q92896	P04578
Q93084	P04578
Q96AJ9	P04578
Q96DZ1	P04578
Q96EE3	P04578
Q96IV0	P04578
Q96R06	P04578
Q96RQ1	P04578
Q99442	P04578
Q99470	P04578
Q99623	P04578
Q99942	P04578
Q9BRK5	P04578
Q9BS26	P04578
Q9BTV4	P04578
Q9BUT9	P04578
Q9BUV8	P04578
Q9BV68	P04578
Q9BXS5	P04578
Q9BYC5	P04578
Q9BZQ6	P04578
Q9H0U3	P04578
Q9H3P7	P04578
Q9H496	P04578
Q9HCN8	P04578
Q9NRD1	P04578
Q9NVV0	P04578
Q9NWW5	P04578
Q9NYJ8	P04578
Q9NYU2	P04578
Q9P035	P04578
Q9P0L0	P04578
Q9UBS4	P04578
Q9UBV2	P04578
Q9UI08	P04578
Q9UJZ1	P04578
Q9UN86	P04578
Q9Y277	P04578
Q9Y282	P04578
Q9Y287	P04578
Q9Y3P9	P04578
Q9Y4L1	P04578
Q9Y5J9	P04578
Q9Y5L4	P04578
P08311	P04578
P08962	P04578
Q13501	P04578
P04216	P04578
O00231	P04578
O00264	P04578
O14656	P04578
O14967	P04578
O15162	P04578
O15234	P04578
O15258	P04578
O15260	P04578
O15460	P04578
O43318	P04578
O43852	P04578
O60220	P04578
O75955	P04578
O94901	P04578
O94919	P04578
O96000	P04578
O96008	P04578
P01130	P04578
P01889	P04578
P02751	P04578
P02786	P04578
P04439	P04578
P10319	P04578
P18465	P04578
P30464	P04578
P30484	P04578
P30491	P04578
P30492	P04578
P30493	P04578
P30495	P04578
P30505	P04578
P30508	P04578
P30510	P04578
P30685	P04578
P48741	P04578
Q29940	P04578
Q29960	P04578
Q29963	P04578
Q95604	P04578
P07237	P04578
Q9ULD8	P04578
P01892	P04578
P01730	P04578
P01733	P04578
P01850	P04578
Q9NS91	P04585
Q9Y2W1	P04585
Q13526	P04585
P20290	P04585
P61758	P04585
P63279	P04585
P05204	P04585
P07858	P04585
P08670	P04585
P10415	P04585
P12532	P04585
P12956	P04585
P13667	P04585
P15924	P04585
P16949	P04585
P19838	P04585
P22314	P04585
P22626	P04585
P22830	P04585
P23526	P04585
P31350	P04585
P31946	P04585
P32121	P04585
P33991	P04585
P33993	P04585
P40337	P04585
P43246	P04585
P46063	P04585
P49591	P04585
P50213	P04585
P55884	P04585
P58107	P04585
P60228	P04585
P61981	P04585
P62258	P04585
P62714	P04585
P62829	P04585
P62993	P04585
P63104	P04585
P68104	P04585
Q02790	P04585
Q02809	P04585
Q07820	P04585
Q07864	P04585
Q08380	P04585
Q12874	P04585
Q12948	P04585
Q13347	P04585
Q13617	P04585
Q14152	P04585
Q14566	P04585
Q15084	P04585
Q15293	P04585
Q2T9J0	P04585
Q32P44	P04585
Q5T4S7	P04585
Q69YN4	P04585
Q7L2H7	P04585
Q7Z4H3	P04585
Q86US8	P04585
Q86X55	P04585
Q8N163	P04585
Q8NEW0	P04585
Q8NFF5	P04585
Q8NFG4	P04585
Q8TB72	P04585
Q8TCU4	P04585
Q8TD16	P04585
Q8TEX9	P04585
Q8TF40	P04585
Q92805	P04585
Q92830	P04585
Q96S59	P04585
Q99613	P04585
Q99704	P04585
Q99996	P04585
Q9BRX2	P04585
Q9BTY7	P04585
Q9BU89	P04585
Q9BV29	P04585
Q9BZF3	P04585
Q9GZS3	P04585
Q9H1A4	P04585
Q9H3U1	P04585
Q9H4L5	P04585
Q9H583	P04585
Q9HBG6	P04585
Q9NR33	P04585
Q9NRF9	P04585
Q9NZN5	P04585
Q9P2R7	P04585
Q9UBQ5	P04585
Q9UER7	P04585
Q9UGP4	P04585
Q9UHF7	P04585
Q9UJX6	P04585
Q9UKK3	P04585
Q9UMS0	P04585
Q9Y262	P04585
Q9Y263	P04585
Q9Y265	P04585
Q9Y266	P04585
Q9Y3D0	P04585
Q7Z6Z7	P04585
Q09472	P04585
Q12824	P04585
O15372	P04585
O00303	P04585
O00469	P04585
O14745	P04585
O14976	P04585
O60232	P04585
O60518	P04585
O60610	P04585
O75155	P04585
O75821	P04585
O76071	P04585
O94916	P04585
O95714	P04585
O95793	P04585
O75530	P04585
O15371	P04585
O75475	P04585
Q9BY43	P04591
Q9H3S7	P04591
Q9HC16	P04591
P30419	P04591
Q15025	P04591
Q13617	P04591
Q15369	P04591
Q15370	P04591
Q4VCS5	P04591
P57075	P04591
Q5VW32	P04591
P13987	P04591
P62877	P04591
P26196	P04591
P63165	P04591
Q9P253	P04591
Q9UKV8	P04591
Q9UN37	P04591
Q95460	P04591
P05412	P04591
P07814	P04591
P08962	P04591
P13489	P04591
P14868	P04591
P15880	P04591
P17844	P04591
P18583	P04591
P22492	P04591
P23396	P04591
P26639	P04591
P41252	P04591
P42766	P04591
P46776	P04591
P46779	P04591
P46782	P04591
P47897	P04591
P47914	P04591
P49207	P04591
P49590	P04591
P54136	P04591
P56192	P04591
P60033	P04591
P61221	P04591
P61513	P04591
P62249	P04591
P62913	P04591
P63261	P04591
P63279	P04591
P68133	P04591
P68431	P04591
P83881	P04591
Q02747	P04591
Q06787	P04591
Q08211	P04591
Q12873	P04591
Q12904	P04591
Q13085	P04591
Q13136	P04591
Q13428	P04591
Q14331	P04591
Q15046	P04591
Q16666	P04591
Q5VWQ0	P04591
Q6PCB5	P04591
Q6UWE0	P04591
Q7Z739	P04591
Q86SQ7	P04591
Q86UE4	P04591
Q8N1G4	P04591
Q96I25	P04591
Q96I59	P04591
Q96RQ3	P04591
Q99550	P04591
Q9BUP3	P04591
Q9C035	P04591
Q9H0A0	P04591
Q9H0H0	P04591
Q9H7P6	P04591
Q9H9H4	P04591
Q9NXG2	P04591
Q9NZI8	P04591
Q9P2J5	P04591
Q9UER7	P04591
Q9UGY1	P04591
Q9UII4	P04591
Q9UK41	P04591
Q9UQ35	P04591
Q9Y2W1	P04591
Q9Y3F4	P04591
Q9Y4L5	P04591
Q9Y6Y0	P04591
P07355	P04591
Q7Z3U7	P04591
Q8WUM4	P04591
Q92841	P04591
P62753	P04591
P46934	P04591
P60709	P04591
P62937	P04591
P0CG48	P04591
Q99816	P04591
O43747	P04591
O60551	P04591
O75530	P04591
P04216	P04591
O00560	P04591
O00763	P04591
O14974	P04591
O43290	P04591
O60841	P04591
O75534	P04591
O15524	P04591
O95793	P04591
Q99873	P04591
Q9HD40	P04591
Q9NTK5	P04591
Q9Y6V7	P04591
Q9Y3B7	P04591
Q14978	P04591
Q13155	P04591
Q15427	P04591
P55769	P04591
P19525	P04591
Q9UI47	P04591
Q9UI30	P04591
O43324	P04591
P84077	P04601
P20963	P04601
P12931	P04601
P53618	P04601
P06239	P04601
P06241	P04601
P07602	P04601
P07947	P04601
P07948	P04601
P13995	P04601
P16333	P04601
P30419	P04601
P31040	P04601
P38646	P04601
P41732	P04601
P42771	P04601
P61073	P04601
P62158	P04601
P78369	P04601
Q13177	P04601
Q13501	P04601
Q14155	P04601
Q15052	P04601
Q15904	P04601
Q6UW56	P04601
Q8N0U8	P04601
Q8N726	P04601
Q8TEJ3	P04601
Q969W9	P04601
Q969X5	P04601
Q96A65	P04601
Q96CW1	P04601
Q9BX66	P04601
Q9BXS5	P04601
Q9NPF0	P04601
Q9NQ11	P04601
Q9NX40	P04601
Q9NZJ7	P04601
Q9UBF6	P04601
Q9Y279	P04601
Q9Y2T2	P04601
Q9Y4K3	P04601
Q8WUM4	P04601
P28070	P04601
P15882	P04601
P04899	P04601
P05556	P04601
Q15025	P04601
P51572	P04601
P30086	P04601
Q13491	P04601
P51674	P04601
Q12933	P04601
Q96J02	P04601
Q9NXG6	P04601
P08631	P04601
O14734	P04601
P04233	P04601
O00463	P04601
O15432	P04601
O43505	P04601
O60504	P04601
O94875	P04601
P01730	P04601
P02786	P04601
O95793	P04601
O43169	P04601
P07948	P04604
P08631	P04604
P12931	P04604
Q9H492	P04608
Q9NTG7	P04608
Q9Y5S9	P04608
P78527	P04608
Q15596	P04608
P42771	P04608
Q00987	P04608
P43034	P04608
P51531	P04608
P51532	P04608
Q13501	P04608
P10827	P04608
P20226	P04608
P60900	P04608
P62136	P04608
P62191	P04608
P19447	P04608
P24928	P04608
Q8N6T7	P04608
Q8N726	P04608
P63272	P04608
P06493	P04608
P06748	P04608
P06899	P04608
P0C0S5	P04608
P11388	P04608
P11940	P04608
P13984	P04608
P14859	P04608
P16104	P04608
P17480	P04608
P17844	P04608
P18074	P04608
P19338	P04608
P19387	P04608
P19388	P04608
P19838	P04608
P20618	P04608
P20671	P04608
P20700	P04608
P22087	P04608
P23527	P04608
P24863	P04608
P25205	P04608
P25440	P04608
P25490	P04608
P25788	P04608
P25789	P04608
P28062	P04608
P28072	P04608
P28074	P04608
P29084	P04608
P29692	P04608
P31942	P04608
P31943	P04608
P33778	P04608
P33993	P04608
P35232	P04608
P35250	P04608
P35251	P04608
P35556	P04608
P35579	P04608
P36873	P04608
P36954	P04608
P40306	P04608
P40692	P04608
P42166	P04608
P42167	P04608
P43243	P04608
P43403	P04608
P46060	P04608
P46087	P04608
P49336	P04608
P49411	P04608
P49720	P04608
P49721	P04608
P49790	P04608
P49792	P04608
P50402	P04608
P51398	P04608
P51784	P04608
P51946	P04608
P51948	P04608
P52272	P04608
P52292	P04608
P52434	P04608
P52435	P04608
P52948	P04608
P53350	P04608
P53803	P04608
P55265	P04608
P55884	P04608
P58876	P04608
P60228	P04608
P60709	P04608
P61218	P04608
P61964	P04608
P62487	P04608
P62807	P04608
P62826	P04608
P62875	P04608
P63244	P04608
P67809	P04608
P68104	P04608
P78346	P04608
Q00403	P04608
Q01196	P04608
Q03111	P04608
Q03164	P04608
Q06945	P04608
Q07021	P04608
Q08945	P04608
Q09028	P04608
Q12788	P04608
Q12905	P04608
Q12906	P04608
Q13049	P04608
Q13330	P04608
Q13422	P04608
Q13547	P04608
Q14103	P04608
Q14152	P04608
Q14191	P04608
Q14498	P04608
Q14527	P04608
Q14566	P04608
Q14739	P04608
Q14807	P04608
Q14839	P04608
Q14966	P04608
Q14974	P04608
Q14980	P04608
Q15003	P04608
Q15021	P04608
Q15022	P04608
Q15059	P04608
Q15393	P04608
Q15397	P04608
Q15637	P04608
Q16576	P04608
Q16695	P04608
Q16777	P04608
Q16778	P04608
Q16891	P04608
Q29RF7	P04608
Q4G0J3	P04608
Q53H47	P04608
Q5JTV8	P04608
Q5QJE6	P04608
Q5SSJ5	P04608
Q63HN8	P04608
Q6P2E9	P04608
Q6P2Q9	P04608
Q71UI9	P04608
Q7L2E3	P04608
Q7L2J0	P04608
Q7L7L0	P04608
Q7Z6E9	P04608
Q86U86	P04608
Q86VP6	P04608
Q86YP4	P04608
Q8IUE6	P04608
Q8N1F7	P04608
Q8N7H5	P04608
Q8NAF0	P04608
Q8NCA5	P04608
Q8TDN6	P04608
Q8TDX7	P04608
Q8TF68	P04608
Q8WWP7	P04608
Q8WXI9	P04608
Q8WYP5	P04608
Q92616	P04608
Q92621	P04608
Q92769	P04608
Q92785	P04608
Q92804	P04608
Q92830	P04608
Q92922	P04608
Q93077	P04608
Q93079	P04608
Q96A08	P04608
Q96FV9	P04608
Q96GN5	P04608
Q96HN2	P04608
Q96I25	P04608
Q96JP5	P04608
Q96KK5	P04608
Q96KQ7	P04608
Q96L91	P04608
Q96ME7	P04608
Q96PK6	P04608
Q96QV6	P04608
Q96RJ0	P04608
Q96ST3	P04608
Q96T58	P04608
Q99436	P04608
Q99459	P04608
Q99525	P04608
Q99567	P04608
Q99623	P04608
Q99733	P04608
Q99877	P04608
Q99879	P04608
Q99880	P04608
Q9BPX3	P04608
Q9BTC8	P04608
Q9BVP2	P04608
Q9BW27	P04608
Q9BWT1	P04608
Q9BZE4	P04608
Q9C0C9	P04608
Q9C0K0	P04608
Q9H0A0	P04608
Q9H307	P04608
Q9H4L4	P04608
Q9HAF1	P04608
Q9HCK8	P04608
Q9NPF5	P04608
Q9NR30	P04608
Q9NTI5	P04608
Q9NTJ3	P04608
Q9NUL3	P04608
Q9NVP1	P04608
Q9NXF7	P04608
Q9NY61	P04608
Q9NYH9	P04608
Q9P0M6	P04608
Q9P0U4	P04608
Q9P2K5	P04608
Q9UBB5	P04608
Q9UHB7	P04608
Q9UIG0	P04608
Q9UJX3	P04608
Q9UK99	P04608
Q9UKN8	P04608
Q9UKV3	P04608
Q9UMR2	P04608
Q9UNQ2	P04608
Q9UQ35	P04608
Q9UQE7	P04608
Q9Y230	P04608
Q9Y252	P04608
Q9Y265	P04608
Q9Y2X3	P04608
Q9Y383	P04608
Q9Y4A5	P04608
Q9Y5B9	P04608
Q9Y5Q8	P04608
Q9Y6E2	P04608
Q9Y6G9	P04608
P04637	P04608
Q8IXJ6	P04608
Q96EB6	P04608
Q9P1T7	P04608
P50613	P04608
Q8TAQ2	P04608
P29083	P04608
P10145	P04608
P10914	P04608
P30876	P04608
P32780	P04608
P51825	P04608
Q15047	P04608
Q92993	P04608
Q96T68	P04608
Q01826	P04608
P35269	P04608
Q92793	P04608
Q92831	P04608
Q12824	P04608
P08047	P04608
Q09472	P04608
O00267	P04608
O15350	P04608
O00257	P04608
O00303	P04608
O00422	P04608
O00541	P04608
O00567	P04608
O00571	P04608
O14497	P04608
O14818	P04608
O14980	P04608
O14981	P04608
O15047	P04608
O15355	P04608
O15514	P04608
O43143	P04608
O43463	P04608
O43865	P04608
O43913	P04608
O43929	P04608
O60264	P04608
O60814	P04608
O75367	P04608
O75478	P04608
O75529	P04608
O75533	P04608
O75607	P04608
O75643	P04608
O94776	P04608
O95067	P04608
O95232	P04608
O95251	P04608
O95347	P04608
O95365	P04608
O95619	P04608
O95983	P04608
O96019	P04608
O96028	P04608
P51816	P04608
P50750	P04608
O60563	P04608
P36873	P04610
P50750	P04610
P05455	P04618
P06748	P04618
P07237	P04618
P07437	P04618
P07910	P04618
P08621	P04618
P08708	P04618
P08865	P04618
P09234	P04618
P09651	P04618
P0DN76	P04618
P11940	P04618
P14625	P04618
P15880	P04618
P16615	P04618
P17844	P04618
P17858	P04618
P18074	P04618
P18077	P04618
P18621	P04618
P19447	P04618
P19784	P04618
P20042	P04618
P22626	P04618
P23246	P04618
P23284	P04618
P27695	P04618
P27797	P04618
P29372	P04618
P31942	P04618
P31943	P04618
P31948	P04618
P33240	P04618
P33778	P04618
P35544	P04618
P35637	P04618
P35658	P04618
P39023	P04618
P39687	P04618
P41091	P04618
P42285	P04618
P43243	P04618
P46060	P04618
P46063	P04618
P46782	P04618
P49458	P04618
P49755	P04618
P49916	P04618
P51991	P04618
P52272	P04618
P52292	P04618
P52294	P04618
P52597	P04618
P52789	P04618
P52948	P04618
P53999	P04618
P55081	P04618
P55265	P04618
P55795	P04618
P58876	P04618
P61011	P04618
P61247	P04618
P61353	P04618
P62266	P04618
P62304	P04618
P62306	P04618
P62308	P04618
P62701	P04618
P62753	P04618
P62805	P04618
P62807	P04618
P62826	P04618
P62829	P04618
P62851	P04618
P62910	P04618
P62979	P04618
P63151	P04618
P63244	P04618
P67870	P04618
P68104	P04618
P68363	P04618
P68366	P04618
P68371	P04618
P68400	P04618
P78527	P04618
P82933	P04618
P84090	P04618
P84243	P04618
Q00839	P04618
Q01081	P04618
Q01082	P04618
Q01813	P04618
Q01844	P04618
Q02809	P04618
Q02878	P04618
Q04837	P04618
Q07666	P04618
Q08211	P04618
Q12874	P04618
Q12905	P04618
Q12906	P04618
Q12996	P04618
Q13123	P04618
Q13242	P04618
Q13347	P04618
Q13509	P04618
Q13523	P04618
Q13619	P04618
Q13885	P04618
Q14103	P04618
Q14204	P04618
Q14444	P04618
Q14498	P04618
Q14690	P04618
Q14974	P04618
Q15024	P04618
Q15165	P04618
Q15185	P04618
Q15233	P04618
Q15424	P04618
Q15428	P04618
Q15459	P04618
Q15645	P04618
Q16531	P04618
Q16630	P04618
Q16778	P04618
Q2TAY7	P04618
Q52LJ0	P04618
Q53GS9	P04618
Q5QNW6	P04618
Q5T4S7	P04618
Q66LE6	P04618
Q6KC79	P04618
Q6P2Q9	P04618
Q71U36	P04618
Q7L2H7	P04618
Q7Z2T5	P04618
Q7Z6Z7	P04618
Q7Z7H5	P04618
Q86U38	P04618
Q86W42	P04618
Q86XZ4	P04618
Q8N257	P04618
Q8N5C6	P04618
Q8N684	P04618
Q8NE71	P04618
Q8NI36	P04618
Q8WV92	P04618
Q8WWY3	P04618
Q8WXF1	P04618
Q92499	P04618
Q92688	P04618
Q92841	P04618
Q92973	P04618
Q92979	P04618
Q93079	P04618
Q96BP2	P04618
Q96DI7	P04618
Q96EP5	P04618
Q96GM8	P04618
Q96HA1	P04618
Q96QR8	P04618
Q96T37	P04618
Q96T60	P04618
Q99459	P04618
Q99729	P04618
Q99733	P04618
Q99877	P04618
Q99879	P04618
Q99880	P04618
Q9BQE3	P04618
Q9BQG0	P04618
Q9BTD8	P04618
Q9BTM1	P04618
Q9BTT0	P04618
Q9BVA1	P04618
Q9BVC5	P04618
Q9BVK6	P04618
Q9GZR7	P04618
Q9H0S4	P04618
Q9H2U1	P04618
Q9HAN9	P04618
Q9HCN4	P04618
Q9HD23	P04618
Q9NQ55	P04618
Q9NQT4	P04618
Q9NR30	P04618
Q9NY65	P04618
Q9P2I0	P04618
Q9UKV3	P04618
Q9UMS4	P04618
Q9UNX4	P04618
Q9Y224	P04618
Q9Y265	P04618
Q9Y2Q9	P04618
Q9Y2X3	P04618
Q9Y3B2	P04618
Q9Y3I0	P04618
Q9Y5B6	P04618
Q9Y5B9	P04618
Q9Y6G3	P04618
P55209	P04618
O14980	P04618
O00571	P04618
O00629	P04618
O00743	P04618
O14979	P04618
O15504	P04618
O43390	P04618
O43423	P04618
O43660	P04618
O43776	P04618
O43847	P04618
O60506	P04618
O60684	P04618
O75037	P04618
O75643	P04618
O94906	P04618
O95208	P04618
O95373	P04618
P04350	P04618
P04406	P04618
Q5T3I0	P04618
Q15363	P04618
Q13617	P05888
P0CG48	P05888
Q13748	P05888
O15524	P05888
P43487	P05919
P49792	P05919
Q15843	P05919
Q6P1M0	P05919
Q6P2E9	P05919
Q8IY95	P05919
Q8NCG7	P05919
Q96G23	P05919
Q9C0E2	P05919
Q9HCU5	P05919
P55084	P05919
P48047	P05919
P42704	P05919
P13598	P05919
P06576	P05919
P42695	P05919
P24539	P05919
P18859	P05919
P20020	P05919
P40939	P05919
P26038	P05919
P30049	P05919
Q96P70	P05919
Q53GQ0	P05919
P78527	P05919
P63208	P05919
P78357	P05919
Q16537	P05919
Q15185	P05919
Q96F15	P05919
Q86T03	P05919
Q5T9A4	P05919
Q63HN8	P05919
Q969Z0	P05919
Q86XR8	P05919
Q8TC07	P05919
Q9UHQ9	P05919
Q9HAV4	P05919
Q99653	P05919
Q9GZT3	P05919
Q9UBB4	P05919
Q9NQC3	P05919
Q9NVI7	P05919
Q9Y6D5	P05919
Q9UKB1	P05919
Q9Y6D6	P05919
Q13616	P05919
Q9Y297	P05919
O75947	P05919
O95470	P05919
P01730	P05919
O14980	P05919
O14828	P05919
O95197	P05919
O95573	P05919
Q10589	P05923
P07992	P05928
P53350	P05928
Q13619	P05928
Q16531	P05928
Q5VYV7	P05928
Q8IY92	P05928
Q92889	P05928
Q96AY2	P05928
Q96NY9	P05928
Q9BW61	P05928
Q9H0U9	P05928
Q9Y4B6	P05928
P62937	P12497
Q69YN4	P12497
P62993	P12497
O14745	P12497
Q99615	P12504
Q9NWF9	P12504
Q13951	P12504
Q16659	P12504
Q13501	P12504
P61289	P12504
Q7L5D6	P12504
Q9BZK7	P12504
Q9HC16	P12504
Q9UNE7	P12504
P21673	P12504
Q9UBF6	P12504
Q93034	P12504
Q7Z6Z7	P12504
Q13227	P12504
P25686	P12504
P46379	P12504
Q9ULX6	P12504
Q9Y5V3	P12504
Q8TEB1	P12504
Q8IWV8	P12504
Q15370	P12504
Q13617	P12504
Q15369	P12504
Q9C0C7	P12504
O15379	P12504
O75376	P12504
P08631	P12504
P11441	P12504
P13051	P12520
P17152	P12520
P57678	P12520
P61201	P12520
P61289	P12520
Q13098	P12520
Q13619	P12520
Q13724	P12520
Q16637	P12520
Q7L5N1	P12520
Q8IZ07	P12520
Q92905	P12520
Q96PU5	P12520
Q99627	P12520
Q9H840	P12520
Q9NX00	P12520
Q9UHI6	P12520
Q9UNS2	P12520
Q96A33	P12520
P21964	P12520
Q16576	P12520
P43243	P12520
P28288	P12520
Q16531	P12520
Q13409	P12520
Q14204	P12520
Q8TEB1	P12520
Q5T8D3	P12520
Q2PZI1	P12520
Q8IWZ3	P12520
Q5TAQ9	P12520
Q6ZPD9	P12520
Q9Y6G9	P12520
Q9BT78	P12520
Q9BW61	P12520
Q9Y6C9	P12520
Q9NRK6	P12520
Q8WXD5	P12520
Q5SW79	P12520
Q9H4A6	P12520
Q9Y4B6	P12520
O14893	P12520
O75386	P12520
O00116	P12520
O75179	P12520
O00217	P12520
O14929	P12520
P53618	P15829
P01730	P19554
P40337	P35963
P62158	P35963
P61758	P35963
Q10589	P69699
Q9Y297	P69700
P01730	P69700
Q99683	P69720
Q96J02	P69720
Q9NRW3	P69720
Q00987	P69720
Q16659	P69720
Q00839	P69720
Q16531	P69720
Q08211	P69720
Q01196	P69720
Q9C0C7	P69720
Q7Z6Z7	P69720
Q86VP6	P69720
Q9BZK7	P69720
Q99615	P69720
Q9Y5V3	P69720
Q9GZX7	P69720
Q9NR30	P69720
Q9Y4B6	P69720
Q9UMS4	P69720
Q9ULX6	P69720
Q9UBF6	P69720
Q9UBN7	P69720
Q969M7	P69720
Q9NWF9	P69720
Q13227	P69720
Q13501	P69720
Q13617	P69720
Q8IWV8	P69720
Q8TEB1	P69720
Q9UNE7	P69720
Q13951	P69720
Q15370	P69720
Q8IUX4	P69720
Q15369	P69720
Q93034	P69720
Q9HC16	P69720
P28482	P69720
P34932	P69720
P46379	P69720
P25686	P69720
P21673	P69720
P14866	P69720
P04637	P69720
O75376	P69720
O60885	P69720
P62877	P69720
P50750	P69720
P46934	P69720
O15379	P69720
P0CG48	P69720
P11441	P69720
P26196	P69720
P61289	P69720
Q99683	P69721
Q96J02	P69721
Q9NRW3	P69721
Q9Y4B6	P69721
Q00839	P69721
Q08211	P69721
Q00987	P69721
Q01196	P69721
Q9UMS4	P69721
Q16659	P69721
Q16531	P69721
Q7Z6Z7	P69721
Q86VP6	P69721
Q9C0C7	P69721
Q99615	P69721
Q9BZK7	P69721
Q9ULX6	P69721
Q9GZX7	P69721
Q9NR30	P69721
Q9Y5V3	P69721
Q9UBF6	P69721
Q9UBN7	P69721
Q969M7	P69721
Q9NWF9	P69721
Q13227	P69721
Q13501	P69721
Q13617	P69721
Q8IWV8	P69721
Q8TEB1	P69721
Q9UNE7	P69721
Q13951	P69721
Q15370	P69721
Q8IUX4	P69721
Q15369	P69721
Q93034	P69721
Q9HC16	P69721
P28482	P69721
P34932	P69721
O60885	P69721
P50750	P69721
P14866	P69721
O75376	P69721
P04637	P69721
P46379	P69721
P21673	P69721
P25686	P69721
P62877	P69721
P46934	P69721
O15379	P69721
P0CG48	P69721
P11441	P69721
P26196	P69721
P61289	P69721
Q99683	P69722
Q96J02	P69722
Q9NRW3	P69722
Q9NR30	P69722
Q00987	P69722
Q01196	P69722
Q00839	P69722
Q08211	P69722
Q7Z6Z7	P69722
Q16659	P69722
Q16531	P69722
Q86VP6	P69722
Q9GZX7	P69722
Q9C0C7	P69722
Q99615	P69722
Q9BZK7	P69722
Q9UMS4	P69722
Q9ULX6	P69722
Q9Y4B6	P69722
Q9Y5V3	P69722
Q9UBF6	P69722
Q9UBN7	P69722
Q969M7	P69722
Q9NWF9	P69722
Q13227	P69722
Q13501	P69722
Q13617	P69722
Q8IWV8	P69722
Q8TEB1	P69722
Q9UNE7	P69722
Q13951	P69722
Q15370	P69722
Q8IUX4	P69722
Q15369	P69722
Q93034	P69722
Q9HC16	P69722
P28482	P69722
P34932	P69722
P25686	P69722
O75376	P69722
O60885	P69722
P21673	P69722
P04637	P69722
P14866	P69722
P46379	P69722
P50750	P69722
P62877	P69722
P46934	P69722
O15379	P69722
P0CG48	P69722
P11441	P69722
P26196	P69722
P61289	P69722
Q99683	P69723
Q96J02	P69723
Q9NRW3	P69723
Q9GZX7	P69723
Q9C0C7	P69723
Q9BZK7	P69723
Q00987	P69723
Q00839	P69723
Q99615	P69723
Q01196	P69723
Q08211	P69723
Q16659	P69723
Q16531	P69723
Q7Z6Z7	P69723
Q86VP6	P69723
Q9NR30	P69723
Q9Y4B6	P69723
Q9UMS4	P69723
Q9ULX6	P69723
Q9Y5V3	P69723
Q9UBF6	P69723
Q9UBN7	P69723
Q969M7	P69723
Q9NWF9	P69723
Q13227	P69723
Q13501	P69723
Q13617	P69723
Q8IWV8	P69723
Q8TEB1	P69723
Q9UNE7	P69723
Q13951	P69723
Q15370	P69723
Q8IUX4	P69723
Q15369	P69723
Q93034	P69723
Q9HC16	P69723
P28482	P69723
P34932	P69723
O75376	P69723
O60885	P69723
P62877	P69723
P21673	P69723
P04637	P69723
P14866	P69723
P50750	P69723
P25686	P69723
P46379	P69723
P46934	P69723
O15379	P69723
P0CG48	P69723
P11441	P69723
P26196	P69723
P61289	P69723
Q16531	P69726
P21796	P69728
P62937	Q72497
P68400	Q72547
Q7Z4H3	Q76353
Q9H3U1	Q76353
Q8NEW0	Q76353
Q9Y3D0	Q76353
Q8TEX9	Q76353
Q9GZS3	Q76353
Q9P2R7	Q76353
Q9H583	Q76353
Q9Y263	Q76353
P31946	Q76353
P22314	Q76353
O75475	Q76353
O76071	Q76353
O00469	Q76353
Q02809	Q76353
P61981	Q76353
O60518	Q76353
O75155	Q76353
P12532	Q76353
P15924	Q76353
P62258	Q76353
P63104	Q76353
Q14566	Q76353
Q2T9J0	Q76353
P13667	Q76353
Q9HC16	Q77YG0
P62937	Q79791
Q92556	Q85737
Q92608	Q85737
P06241	Q85737
P07948	Q85737
P12931	Q85737
P15153	Q85737
P63000	Q85737
P08631	Q85737
P0DMV9	Q900A7
Q8TEJ3	Q90VU7
P06239	Q90VU7
P06241	Q90VU7
P07947	Q90VU7
P07948	Q90VU7
P12931	Q90VU7
P16333	Q90VU7
Q14155	Q90VU7
Q15052	Q90VU7
P08631	Q90VU7
Q9UGP4	Q9Q2G4
Q9UKK3	Q9Q2G4
Q9UBQ5	Q9Q2G4
Q9Y262	Q9Q2G4
Q9UHF7	Q9Q2G4
Q9UMS0	Q9Q2G4
Q9H8Y5	Q9Q2G4
P33991	Q9Q2G4
Q12948	Q9Q2G4
Q14152	Q9Q2G4
O15372	Q9Q2G4
P61758	Q9Q2G4
O60610	Q9Q2G4
O14976	Q9Q2G4
O94916	Q9Q2G4
Q5T4S7	Q9Q2G4
Q02790	Q9Q2G4
Q8TD16	Q9Q2G4
Q9BTY7	Q9Q2G4
Q12874	Q9Q2G4
Q8N163	Q9Q2G4
O95714	Q9Q2G4
P23526	Q9Q2G4
P43246	Q9Q2G4
P49591	Q9Q2G4
P55884	Q9Q2G4
P58107	Q9Q2G4
Q07820	Q9Q2G4
Q07864	Q9Q2G4
Q32P44	Q9Q2G4
Q7L2H7	Q9Q2G4
Q86US8	Q9Q2G4
Q86X55	Q9Q2G4
Q8NFF5	Q9Q2G4
Q8NFG4	Q9Q2G4
Q8TCU4	Q9Q2G4
Q92805	Q9Q2G4
Q99704	Q9Q2G4
Q99996	Q9Q2G4
Q9BU89	Q9Q2G4
Q9H1A4	Q9Q2G4
Q9NR33	Q9Q2G4
Q9NZN5	Q9Q2G4
O00303	Q9Q2G4
O60232	Q9Q2G4
O15371	Q9Q2G4
Q9HBG6	Q9Q2G4
Q8TB72	Q9Q2G4
P32121	Q9Q2G4
P60228	Q9Q2G4
Q99613	Q9Q2G4
Q8TF40	Q9Q2G4
Q9H4L5	Q9Q2G4
Q9BZF3	Q9Q2G4
Q9NRF9	Q9Q2G4
P12931	Q9QPN3
P07948	Q9QPN3
P06241	Q9QPN3
P08631	Q9QPN3

## Sheet: All new host training data
human	virus
Q8WWM7	Q6QDQ4
Q9HCE1	Q6QDQ4
Q7L2E3	Q6QDQ4
Q71RC2	Q6QDQ4
Q92900	Q6QDQ4
Q92615	Q6QDQ4
Q92841	Q6QDQ4
Q9H2U1	Q6QDQ4
Q99613	Q6QDQ4
Q92945	Q6QDQ4
Q9NUD5	Q6QDQ4
Q9Y520	Q6QDQ4
Q9Y3F4	Q6QDQ4
Q9NZI8	Q6QDQ4
Q9Y262	Q6QDQ4
Q16629	Q6QDQ4
Q15717	Q6QDQ4
Q15366	Q6QDQ4
P11940	Q6QDQ4
P09651	Q6QDQ4
P07910	Q6QDQ4
O00425	Q6QDQ4
O14979	Q6QDQ4
P06730	Q6QDQ4
O15523	Q6QDQ4
O43432	Q6QDQ4
P55884	Q6QDQ4
P23246	Q6QDQ4
P17844	Q6QDQ4
P22626	Q6QDQ4
P31943	Q6QDQ4
P31942	Q6QDQ4
P26599	Q6QDQ4
Q15233	Q6QDQ4
P42704	Q6QDQ4
P35637	Q6QDQ4
P38159	Q6QDQ4
P52597	Q6QDQ4
P51991	Q6QDQ4
P43243	Q6QDQ4
Q14671	Q6QDQ4
Q06787	Q6QDQ4
P62318	Q6QDQ4
P60842	Q6QDQ4
P61978	Q6QDQ4
P84103	Q6QDQ4
P63244	Q6QDQ4
P67809	Q6QDQ4
Q13310	Q6QDQ4
Q08211	Q6QDQ4
Q07955	Q6QDQ4
Q08170	Q6QDQ4
Q13151	Q6QDQ4
Q12905	Q6QDQ4
Q12906	Q6QDQ4
Q6PKG0	Q6QDQ4
P62753	P0C6U8
P63165	P59595
Q9BYF1	Q6Q1S2
P09651	P59595
O75348	P0C6X7
O43291	Q03499
O43291	P69616
P02760	P69616
P61604	P27958
P60174	P27958
P55209	P27958
P29966	P27958
Q99996	P29991
Q14318	P27958
P80723	P27958
P68371	P27958
P61956	P27958
P62937	P27958
Q9BVG3	Q99IB8
Q9BXC0	Q99IB8
Q9GZR7	Q99IB8
Q9H074	Q99IB8
Q06830	P27958
Q9NQB0	Q99IB8
Q9NZM3	Q99IB8
Q9P219	Q99IB8
Q9ULJ7	Q99IB8
Q9UNS2	Q99IB8
Q9Y262	Q99IB8
Q9Y2W2	Q99IB8
Q00325	P27958
Q04941	P27958
Q9H7B4	P27958
Q15717	P27958
Q7L9L4	P27958
Q562R1	P27958
Q9P0L0	P27958
Q9H8S9	P27958
Q96SI9	Q03463
Q9BUZ4	P14335
Q9BUZ4	Q5ERI7
Q9BWH2	P29991
Q9UJY5	Q9E7P0
Q9H074	P29991
Q9H2W1	Q03463
Q9NYJ8	P29991
Q9P0K7	P29991
Q9Y6B2	P29991
Q9Y5W7	Q99IB8
P12036	D2CFJ1
P22492	D2CFJ1
Q02539	D2CFJ1
Q15369	D2CFJ1
Q15370	D2CFJ1
Q9BRZ2	D2CFJ1
Q13625	P29991
Q9ULX6	P29991
Q9UKX7	P29991
Q14980	P29991
Q9UJC3	P29991
Q14789	P29991
P63279	P29991
P34931	P29991
P30041	P29991
P51648	P29991
P35222	P29991
P49327	P29991
Q13813	P29991
Q03001	P29991
P68543	P29991
P78344	P29991
Q0VF96	P29991
Q05519	P29991
Q08379	P29991
Q9P219	P29991
Q8WXH0	P29991
Q86SQ7	P29991
Q53SF7	P29991
Q15154	P29991
Q7Z406	P29991
Q5JTC6	P29991
Q6FHW4	P29991
Q8WUM4	P29991
Q8IWT0	P29991
Q86UP2	P29991
Q8IVP5	P29991
Q8NF91	P29991
Q8IX03	P29991
Q8NEF9	P29991
Q96NL6	P29991
Q92667	P29991
Q969X0	P29991
Q99715	P29991
Q99460	P29991
Q99614	P29991
Q9BVG3	P29991
Q9BZF9	P29991
Q9NX95	P29991
Q9H6D7	P29991
Q9Y6C2	P29991
Q14203	P29991
Q14692	P29991
Q13561	P29991
Q13137	P29991
Q14999	P29991
Q15643	P29991
P43243	P29991
Q6UXK2	Q03463
P22492	A9YDK9
Q02539	A9YDK9
Q15369	A9YDK9
Q15370	A9YDK9
Q9BRZ2	A9YDK9
Q9H6S1	Q5ERI7
Q5JU67	P14335
Q5M9Q1	P14335
Q9BRZ2	Q5U8Y3
P61201	P29991
Q66GS9	P29991
P25963	P14335
P30622	P14335
P54259	P14335
P63241	P14335
Q03112	P14335
Q12873	P14335
Q13232	P14335
Q5VV67	P14335
Q6NSJ2	P14335
Q6ZTR7	P14335
Q76N89	P14335
Q7Z5R6	P14335
Q8WXU2	P14335
Q96CV9	P14335
Q96MT8	P14335
Q96S94	P14335
Q99848	P14335
Q9BZR8	P14335
Q9H6S1	P14335
Q9NPJ6	P14335
Q9NVW2	P14335
Q9UIK5	P14335
Q9UJY5	P14335
Q9UNM6	P14335
Q9Y3T9	P14335
Q9Y6X2	P14335
P14618	P14340
P50395	P14340
P60709	P14340
P68104	P14340
P62993	P26660
P62993	P27958
P67870	P26662
Q92804	Q91B85
Q96CN5	Q91B85
Q96EA4	Q91B85
Q99750	Q91B85
Q9BPW8	Q91B85
Q9BV36	Q91B85
Q9BV73	Q91B85
Q9H270	Q91B85
Q9H7J1	Q91B85
Q9H814	Q91B85
Q9NS15	Q91B85
Q9NWQ4	Q91B85
Q9Y6X2	Q91B85
Q92804	Q91NH1
Q96EQ8	Q91NH1
Q9BV36	Q91NH1
Q9H270	Q91NH1
Q9UK99	Q99IB8
Q8NEZ2	P29991
Q9ULJ7	P29991
Q9UNK0	Q99IB8
Q9UQ90	P29991
Q9UQ90	Q99IB8
Q96CV9	Q8QXP6
Q96MT8	Q8QXP6
Q9Y277	Q9WMX2
Q9Y3I0	Q9WMX2
Q9Y5V3	Q9WMX2
Q9Y605	Q9WMX2
Q13451	O39474
Q86VP1	P29991
Q8IXK0	Q88489
Q8NB25	Q88489
Q92804	Q88489
Q92993	Q88489
Q96EA4	Q88489
Q96EQ8	Q88489
Q96G01	Q88489
Q9BV36	Q88489
Q9H270	Q88489
Q9H814	Q88489
Q9HD26	Q88489
Q9NP64	Q88489
Q9Y6C2	Q88489
Q9BYC9	Q8JU44
Q8N302	P29991
Q9H6S1	Q9E7P0
P42224	P26664
P37231	P26662
P52630	P29991
Q8IUD2	P29991
Q92564	P29991
P06241	O92972
P07948	O92972
P55265	P14340
P08631	O92972
P62993	O92972
Q9UHY1	P14340
Q9H8Y8	Q99IB8
P04049	O39474
Q14318	O39474
Q99816	Q99IB8
O14654	P27958
O00499	P27958
P06239	P27958
O95292	P27958
O94966	P27958
P07437	P27958
P05455	P27958
P05141	P27958
P06748	P27958
P06733	P27958
P10599	P27958
P10809	P27958
P16949	P27958
P14174	P27958
P11021	P27958
P12236	P27958
O14628	Q99IB8
O14763	Q99IB8
O95613	Q99IB8
P01024	Q99IB8
P02649	Q99IB8
P02675	Q99IB8
P02787	Q99IB8
P04035	Q99IB8
P04114	Q99IB8
P04196	Q99IB8
P06748	Q99IB8
P08603	Q99IB8
P17844	Q99IB8
P35222	Q99IB8
P50440	Q99IB8
P61201	Q99IB8
P80303	Q99IB8
Q08379	Q99IB8
Q13099	Q99IB8
Q13129	Q99IB8
Q13464	Q99IB8
Q13576	Q99IB8
Q13670	Q99IB8
Q14966	Q99IB8
Q14999	Q99IB8
Q14BN4	Q99IB8
Q15084	Q99IB8
Q15717	Q99IB8
Q4ZG55	Q99IB8
Q5JTC6	Q99IB8
Q86UP2	Q99IB8
Q86VW0	Q99IB8
Q8N302	Q99IB8
Q92802	Q99IB8
Q969X0	Q99IB8
Q96CV9	Q99IB8
Q96MT8	Q99IB8
Q96RK0	Q99IB8
Q99550	Q99IB8
Q96GD3	Q9E7P0
P27986	Q99IB8
Q96KQ7	Q99IB8
Q9BZR8	Q9E7P0
Q96MT8	Q9E7P0
O15169	Q9E7P0
O14744	Q9E7P0
P06733	Q9E7P0
P02545	Q9E7P0
O75569	Q9E7P0
P11940	Q9E7P0
P63267	Q9E7P0
P63261	Q9E7P0
P13797	Q9E7P0
Q7Z6G3	Q9E7P0
Q16206	Q9E7P0
Q6NSJ2	Q9E7P0
Q9BV73	Q9E7P0
Q9GZT9	Q9WMX2
A7E2V4	D2CFJ1
P11142	P29846
O00571	P29991
O00505	P29991
A8MPP1	P29991
Q13813	Q99IB8
A6NI86	P29991
A6NCC3	P29991
A2RUB6	P29991
O95613	P29991
O75592	P29991
O15020	P29991
O15117	P29991
O95232	P29991
O75925	P29991
O95154	P29991
P26599	P29991
P04114	P29991
P00558	P29991
P02671	P29991
P17844	P29991
P0C0L4	P29991
P12036	P29991
P0C0L4	Q99IB8
P46939	Q99IB8
P78344	Q99IB8
P0C7X2	P29991
Q14974	Q9WMX2
Q13137	Q99IB8
P45973	Q99IB8
Q13148	Q9WMX2
Q15025	Q9E7P0
Q15154	Q99IB8
Q13232	Q9E7P0
P98175	Q99IB8
Q15643	Q99IB8
A5YKK6	P29991
Q13451	Q9WMX2
O00571	Q9WMX2
O00584	P29991
O00584	Q99IB8
P51571	Q03463
Q02818	Q99IB8
Q03001	Q99IB8
P11142	Q99IB8
A7E2V4	A9YDK9
O14545	Q9E7P0
O14763	P29991
Q13232	Q5ERI7
P11586	Q9WMX2
P55265	Q99IB8
O14972	P29991
O14980	Q9WMX2
A7E2V4	Q5U8Y3
Q15370	Q5U8Y3
O15078	Q8JU44
A2RUB6	Q99IB8
P22307	Q99IB8
P60709	Q9E7P0
O43716	Q99IB8
Q68CP9	Q88489
Q68CP9	Q91B85
Q68CP9	Q91NH1
O14641	P14335
O94842	P14335
O94983	P14335
P02760	P14335
P06733	P14335
P08238	P14335
P08727	P14335
P11940	P14335
P06733	P14340
P07437	P14340
P11413	P14340
P14543	P29991
P14543	Q99IB8
P14618	P26663
P62736	Q9E7P0
O60333	P29991
Q8WWM7	Q99IB8
P07900	P26664
O00327	Q91B85
O14530	Q91B85
O94983	Q91B85
P06733	Q91B85
P08670	Q91B85
P19474	Q91B85
P28799	Q91B85
P31942	Q91B85
P35579	Q91B85
P52742	Q91B85
P55268	Q91B85
P55287	Q91B85
P78504	Q91B85
Q02833	Q91B85
Q13105	Q91B85
Q14160	Q91B85
Q14192	Q91B85
Q5QJE6	Q91B85
Q5VU43	Q91B85
Q7Z5R6	Q91B85
Q8IVT2	Q91B85
Q8IXK0	Q91B85
Q8N5G2	Q91B85
O43255	Q91NH1
O75674	Q91NH1
P35579	Q91NH1
P43243	Q91NH1
P50570	Q91NH1
Q06033	Q91NH1
Q8NB25	Q9E7P0
Q8NEF9	Q99IB8
Q9UPT5	Q9WMX2
P02647	P29991
Q7Z5R6	Q8QXP6
P02647	Q99IB8
Q13554	Q8QXP6
P60866	Q8QXP6
O94983	Q8QXP6
P02675	P29991
P02749	Q99IB8
P02751	P29991
O75521	P29991
P02774	P29991
A8KA83	Q9WMX2
C9JDS9	Q9WMX2
F5GZS6	Q9WMX2
O00264	Q9WMX2
O00499	Q9WMX2
O14598	Q9WMX2
O14681	Q9WMX2
O15173	Q9WMX2
O43175	Q9WMX2
O43852	Q9WMX2
O75127	Q9WMX2
O94966	Q9WMX2
O95153	Q9WMX2
O95292	Q9WMX2
O95373	Q9WMX2
P04908	Q9WMX2
P05023	Q9WMX2
P06241	Q9WMX2
P07437	Q9WMX2
P07900	Q9WMX2
P08238	Q9WMX2
P08574	Q9WMX2
P08631	Q9WMX2
P08754	Q9WMX2
P09651	Q9WMX2
P0C0S8	Q9WMX2
P0DME0	Q9WMX2
P10809	Q9WMX2
P11021	Q9WMX2
P12004	Q9WMX2
P12277	Q9WMX2
P20671	Q9WMX2
P22102	Q9WMX2
P22626	Q9WMX2
P27824	Q9WMX2
P28288	Q9WMX2
P31689	Q9WMX2
P31942	Q9WMX2
P31943	Q9WMX2
P38646	Q9WMX2
P43487	Q9WMX2
P49411	Q9WMX2
P50991	Q9WMX2
P53618	Q9WMX2
P53985	Q9WMX2
P55795	Q9WMX2
P57088	Q9WMX2
P60468	Q9WMX2
P61289	Q9WMX2
P62269	Q9WMX2
P62805	Q9WMX2
P62993	Q9WMX2
P68371	Q9WMX2
P78527	Q9WMX2
Q00610	Q9WMX2
Q03154	Q9WMX2
Q07021	Q9WMX2
Q12905	Q9WMX2
Q13885	Q9WMX2
Q14318	Q9WMX2
Q14739	Q9WMX2
Q15629	Q9WMX2
Q15758	Q9WMX2
Q16637	Q9WMX2
Q16777	Q9WMX2
Q16880	Q9WMX2
Q32P51	Q9WMX2
Q3V6T2	Q9WMX2
Q4VCS5	Q9WMX2
Q6FI13	Q9WMX2
Q6NXR4	Q9WMX2
Q70UQ0	Q9WMX2
Q7L7L0	Q9WMX2
Q7L9L4	Q9WMX2
Q7Z6Z7	Q9WMX2
Q86Y56	Q9WMX2
Q92499	Q9WMX2
Q92973	Q9WMX2
Q93077	Q9WMX2
Q969Z0	Q9WMX2
Q96KK5	Q9WMX2
Q96PU8	Q9WMX2
Q99615	Q9WMX2
Q99878	Q9WMX2
Q9BQG0	Q9WMX2
Q9BTM1	Q9WMX2
Q9BVC6	Q9WMX2
Q9GZU8	Q9WMX2
Q9H4A3	Q9WMX2
Q9H7B4	Q9WMX2
Q9HAV4	Q9WMX2
Q9HB71	Q9WMX2
Q9NVI1	Q9WMX2
Q9NX58	Q9WMX2
Q9P035	Q9WMX2
Q9P219	Q9WMX2
Q9UBB4	Q9WMX2
Q9UGP8	Q9WMX2
Q9UHI6	Q9WMX2
Q9UNF1	Q9WMX2
Q9UNL2	Q9WMX2
P04040	P29991
O94880	Q99IB8
O94979	P29991
O94983	Q9E7P0
O95466	Q03463
P05546	P29991
P05546	Q99IB8
P05787	P29991
P06239	Q9WMX2
P06241	P26660
P06241	P27958
Q12906	Q9E7P0
Q6Q788	Q99IB8
P07942	P29991
P07948	P26660
P07948	Q913V3
P07948	Q9WMX2
Q7Z406	Q99IB8
Q7Z5R6	Q9E7P0
P08631	P26660
P01042	P29991
Q86SQ7	Q99IB8
Q86SX6	Q99IB8
Q86YP4	Q99IB8
O00327	Q88489
O14530	Q88489
O75674	Q88489
P06733	Q88489
P08670	Q88489
P19474	Q88489
P28799	Q88489
P29597	Q88489
P35579	Q88489
P42331	Q88489
P52597	Q88489
P55268	Q88489
P78504	Q88489
Q12824	Q88489
Q13105	Q88489
Q14160	Q88489
Q49A88	Q88489
Q5QJE6	Q88489
Q5VU43	Q88489
P55209	Q9WMX2
P14618	Q9WMX2
O43504	Q9WMX2
Q53GQ0	Q9WMX2
Q99733	Q9WMX2
O00571	Q99IB8
O75592	Q99IB8
P67936	Q99IB8
P26927	Q99IB8
Q14683	Q99IB8
Q9BUZ4	Q9E7P0
P07948	P27958
P25963	Q9E7P0
P27797	P29991
P05106	P06935
O15162	Q9WMX2
P08631	P27958
O43889	P29846
P0DMV9	P29846
P02751	Q99IB8
P08670	P14340
Q96T23	P08563
Q96SF2	P08563
Q9BUG6	P08563
Q96KN4	P08563
Q96L50	Q86500
Q9BZE9	P08563
Q9BZJ7	P08563
Q9H4A4	P08563
Q9H4E5	P08563
P36894	P08563
Q9NV12	Q86500
Q9Y6H1	P08563
Q14241	P08563
P46091	P08563
Q14738	P08563
Q15758	P08563
P50995	P08563
P19838	P08563
P20671	P08563
Q5T7P8	P08563
P57735	P08563
P26572	P08563
Q8N755	P08563
P19086	P08563
Q8NDB2	P08563
Q92922	P08563
Q96CX6	P08563
Q96D21	Q86500
Q07021	P08563
Q8IWU4	P08563
P08567	P08563
Q8IWU5	Q86500
Q8TAD8	Q86500
Q96C92	Q86500
Q9NS67	Q86500
Q9NUM4	Q86500
Q9P2N6	Q86500
Q96BM9	Q86500
Q9BV47	P08563
O14770	P08563
O15155	P08563
O43505	Q86500
Q6P161	Q86500
O60486	P08563
O60669	P08563
P18847	Q86500
P02647	Q86500
O75886	P08563
O95476	P08563
O95707	Q86500
P06732	Q86500
O14633	Q86500
O60224	Q86500
P01562	Q86500
P08218	Q86500
P60842	Q86500

## Sheet: Mus musculus
Host	Virus
A2AN08	P06933
A2AS03	Q69027
F6SEU4	P89462
G5E8K5	Q69027
O08696	P03129
O08734	P03182
O09167	O41974
O35250	E1WAC8
O35393	Q9IH62
O35903	Q8QMN0
O35903	P24766
O35903	Q8JLJ0
O35903	Q9JFT2
O35903	O57300
O54918	P03182
O55038	Q8QMN0
O55038	P24766
O55038	Q8JLJ0
O55038	Q9JFT2
O88351	P14340
O88447	P68619
O88448	P68619
O88522	P24772
O88522	Q06A28
O88597	P68451
O88942	Q913V3
O88947	Q16938
P01647	P05803
P01852	P01552
P01872	P01556
P01882	P01556
P02340	P03070
P02340	Q9DH70
P05622	C5IAU5
P06240	P27958
P06240	P26660
P06240	O92972
P06804	P34015
P07141	P03228
P08113	P03096
P09450	Q9DGW5
P09581	P03228
P0CG50	P9WIA1
P10126	O41974
P10889	Q2F862
P11103	P03087
P11438	P08669
P11928	O89168
P12850	P24766
P13405	P12534
P13405	P03070
P13405	B6DVZ1
P14733	P03096
P14733	P12908
P15864	O41974
P16627	P03070
P17047	P04608
P21107	P03134
P21836	P0C1Y9
P22339	Q8SPE7
P25118	P27958
P26450	P03076
P26450	Q99152
P27870	P03332
P28574	G5EG44
P29452	P18011
P29452	Q56134
P30658	P62795
P31266	Q69139
P31266	P03203
P31266	Q69138
P31750	P03165
P35585	Q90VU7
P35585	P19554
P39429	P27958
P40142	P03332
P40224	Q8QMN0
P40224	Q9JFT2
P40224	Q8JLJ0
P45481	P03254
P45481	P03074
P45481	P03070
P45481	P03255
P45481	P88946
P46414	P43063
P46935	P69720
P46935	P69722
P46935	P69721
P46935	P69723
P47811	P9WIA1
P52293	P03070
P52293	P31345
P52480	P26663
P54116	Q9WMX2
P58774	P03134
P60710	O41974
P61290	O93077
P62816	P68451
P62900	O41974
P62996	O41974
P63017	P03070
P63017	O41974
P63037	P03332
P63073	P18541
P63073	Q6UY77
P63085	P69720
P63085	P69722
P63085	P69721
P63085	P69723
P63166	P21605
P70168	P03070
P70196	P10221
P80318	P04591
P84091	P19554
P86792	P24766
P97801	P03134
P98083	P03076
Q01705	Q77CA8
Q02650	P62795
Q08879	P06931
Q155P7	Q9XSV7
Q3TWW8	O41974
Q4JG03	P68451
Q571K4	P9WIA1
Q60520	P03244
Q60680	P04862
Q60680	P06164
Q60680	P0C1C7
Q60680	Q77M19
Q60680	P35977
Q60737	P03134
Q60855	Q06A28
Q60953	Q8UN00
Q61036	P18851
Q61140	P05433
Q61686	Q5ZUS4
Q61982	Q77CA8
Q62165	P08669
Q62172	Q06A28
Q62191	O41974
Q62230	P04591
Q62245	P26663
Q64701	P12534
Q64702	P03772
Q6P5F9	Q83414
Q6P5F9	P0DJZ2
Q6P5F9	F7CZT8
Q6R5P0	A0A0H3NMJ6
Q6R5P0	Q56086
Q6RHR9	P89079
Q6RHR9	P36709
Q6RHR9	P04489
Q6RHR9	P03126
Q6RHR9	P06463
Q6ZWX6	P08353
Q6ZWX6	O39988
Q76MZ3	P03081
Q76MZ3	O56327
Q811D0	P06463
Q8BL97	O41974
Q8BP67	Q8AZK7
Q8C165	Q69027
Q8VCF0	Q69027
Q8VIM0	Q9XBM8
Q91XE4	P26664
Q91Y86	P9WIA1
Q91ZE9	P68451
Q99020	Q8AZK7
Q99LX0	P03070
Q9CPR4	O41974
Q9CQ22	P01556
Q9D2Y4	U5TQE9
Q9DBG9	Q82235
Q9ESU6	P03122
Q9JIL2	P24766
Q9JIY5	Q65368
Q9JKF1	P03332
Q9JKK1	E1WAC8
Q9JLF7	A0A0H3NMJ6
Q9JLF7	Q56086
Q9JLV1	Q8AZK7
Q9JM05	Q8UN00
Q9QUI1	Q85646
Q9QZK7	P03332
Q9Z0H7	Q66677
Q9Z126	Q2F862
Q9Z2A7	P27958
Q9Z2A7	Q99IB8
Q9Z2B5	P27958
Q9Z2V5	Q910N6
Q9Z2V5	P22435

## Sheet: Bos taurus
Host	Virus
A1A4K3	Q4VW77
A1A4K3	P30021
A5PJP2	Q89582
A5PKA3	P21530
A5PKA3	P19711
A5PKH0	P21530
A5PKH0	P19711
A6QLZ0	P21530
A6QLZ0	P19711
A7YWS3	P21530
A7YWS3	P19711
A7YY58	P21530
A7YY58	P19711
A8E4Q6	P29128
B0JYL6	Q4VW77
E1B705	Q89582
E1B8D6	K4P3M7
E1BBZ3	P21530
E1BBZ3	P19711
E1BE11	P21530
E1BE11	P19711
E1BEK9	P21530
E1BEK9	P19711
E1BHE1	Q89582
F1MFJ6	P21530
F1MFJ6	P19711
F1MLG3	P21530
F1MLG3	P19711
F1MQ85	Q89582
F1MUM9	P19711
F1MZ14	P21530
F1MZ14	P19711
F6RA30	Q89582
O02853	P29128
O19137	P03120
O77775	P21530
O77775	P19711
P00257	P21890
P00514	Q6XGM8
P00515	Q6XGM8
P00711	Q765B0
P00730	P84875
P00735	Q4W8J9
P00735	Q27049
P00760	P01006
P00760	A8DS38
P00921	Q8U4E6
P00974	P29990
P00974	Q52V24
P02253	Q57V41
P02465	O67990
P07589	P80603
P08165	P0A3E0
P14100	P02599
P15690	P21530
P15690	P19711
P23726	P03496
P23726	P03495
P24627	P27958
P45478	P21530
P45478	P19711
P48616	Q8UZC1
P49951	P19711
P60712	Q4VW77
P60712	P30021
P67868	Q4VW77
P68103	P19711
P68103	Q96662
P79101	P03120
P79136	Q8AZK7
Q01061	P02599
Q08DK3	P21530
Q08DK3	P19711
Q0VC10	Q6XHB4
Q0VC92	P21530
Q0VC92	P19711
Q0VD32	Q89582
Q10568	P03120
Q10569	P03120
Q148G7	P21530
Q148G7	P19711
Q17QC8	P21530
Q17QC8	P19711
Q28141	P03309
Q2KII4	P21530
Q2KII4	P19711
Q2KJC9	P21530
Q2KJC9	P19711
Q2NKZ1	P21530
Q2NKZ1	P19711
Q2NKZ1	P04591
Q32P97	P21530
Q32P97	P19711
Q32PH0	P19711
Q3MHH4	P21530
Q3MHH4	P19711
Q3MHL3	Q8AZK7
Q3MHL7	P04591
Q3SWX8	Q8AZK7
Q3T0B7	Q8AZK7
Q3T0F2	P21530
Q3T0F2	P19711
Q3T0F4	Q77M19
Q3T133	Q8AZK7
Q3T142	P21530
Q3T142	P19711
Q3ZBH0	P04591
Q3ZBH9	Q8UZC1
Q3ZBY5	Q89582
Q4A1L4	Q8UZC1
Q4JF28	P19711
Q5E971	Q8AZK7
Q5E997	P21530
Q5E997	P19711
Q5E9A3	Q8AZK7
Q5EA62	P21530
Q5EA62	P19711
Q6VE48	P19711
Q865V0	P21530
Q865V0	P19711
Q95108	P21530
Q95108	P19711
Q95J56	P19711
Q9TU47	P21530
Q9TU47	P19711

## Sheet: Rattus norvegicus
Host	Virus
D3ZH41	A0A142I9X8
D3ZKH6	A0A142I9X8
D3ZPR0	A0A142I9X8
D3ZWW5	A0A142I9X8
D3ZX42	A0A142I9X8
D4A0A1	A0A142I9X8
D4A1D8	A0A142I9X8
D4A3T0	A0A142I9X8
D4A781	A0A142I9X8
D4A857	A0A142I9X8
F1M4A4	A0A142I9X8
F1M589	P03243
O08565	P04578
O08769	P03259
O08769	P03255
O35142	A0A142I9X8
O35314	A0A142I9X8
O55164	P89079
O55164	P36709
O55164	P04489
O55164	P06463
O88280	A0A142I9X8
P01830	A0A142I9X8
P04897	A0A142I9X8
P05182	Q9WMX2
P07152	A0A142I9X8
P07340	A0A142I9X8
P10362	A0A142I9X8
P10719	A0A142I9X8
P11505	A0A142I9X8
P11507	A0A142I9X8
P12749	Q8AZK7
P15791	Q8AZK7
P15999	A0A142I9X8
P15999	Q8AZK7
P16599	P34015
P19511	A0A142I9X8
P25286	A0A142I9X8
P30277	P0C797
P35213	O92972
P35435	A0A142I9X8
P36370	Q77CE4
P36372	Q77CE4
P37285	P68619
P39951	P0C797
P39951	P0C799
P52296	A0A142I9X8
P54290	A0A142I9X8
P58200	A0A142I9X8
P59215	A0A142I9X8
P60881	A0A142I9X8
P61621	A0A142I9X8
P62752	P21605
P63045	A0A142I9X8
P63331	P03076
P70605	A0A142I9X8
P70705	A0A142I9X8
P97629	A0A142I9X8
P97633	P26662
Q05962	P05952
Q06647	A0A142I9X8
Q07647	A0A142I9X8
Q4L1J4	P89079
Q4QQT4	P03076
Q5BJM8	A0A142I9X8
Q5M824	P03076
Q5XIH7	Q8AZK7
Q62625	Q99IB8
Q62625	F1BA49
Q62696	P89079
Q62940	A0A142I9X8
Q62991	A0A142I9X8
Q63470	P03255
Q63635	A0A142I9X8
Q63787	P03076
Q63803	A0A142I9X8
Q64232	A0A142I9X8
Q64542	A0A142I9X8
Q6AY23	Q8AZK7
Q6VBQ5	A0A142I9X8
Q80U96	P0DJZ2
Q8R3Z7	A0A142I9X8
Q9EQG6	A0A142I9X8
Q9WUD2	A0A142I9X8
Q9Z0U4	A0A142I9X8
Q9Z1E1	A0A142I9X8

[truncated: 27 more sheets: Sus scrofa, Escherichia coli, Data set 1 (1 - 1), Data set 1 (1 - 2), Data set 1 (1 - 3), Data set 2 (1 - 1), Data set 2 (1 - 2), Data set 2 (1 - 3), Data set 3 (1 - 1), Data set 3 (1 - 2), Data set 3 (1 -3), HCV (sequence similarity), SARS (sequence similarity), H1N1 (sequence similarity), HPV-16 (sequence similarity), HIV-1 (sequence similarity), Musmusculus_sequence similarity, Bos taurus sequence similarity, Rattus norvegicus , Sus scrofa sequence similarity …]
